# Supplementary material
Source: PubMed Central journal article supplement (PMC9362108)
Supplement: 41564_2022_1172_MOESM1_ESM.pdf [file 41564_2022_1172_MOESM1_ESM.pdf]

1 **Supplemental Table 1:** Reference tables for Figure 2 - Distribution of COVID-19  
 2 associated invasive fungal infections per country. a. COVID-19-associated pulmonary  
 3 aspergillosis (CAPA), b. COVID-19-associated mucormycosis (CAM), and c. COVID-19-  
 4 associated *Candida* infections (CAC)

5 a. CAPA

| REFERENCE                                          | NUMBER | COUNTRY   | CITY          | TIME PERIOD              |
|----------------------------------------------------|--------|-----------|---------------|--------------------------|
| FERNANDEZ, NB <sup>1</sup>                         | 1      | Argentina | Buenos Aires  | 2020 Apr                 |
| BENEDETTI, MF <sup>2</sup>                         | 5      | Argentina | Buenos Aires  | 2020                     |
| SASONI, N <sup>3</sup>                             | 1      | Argentina | Santa Fe      | 2020 Mar                 |
| SHARMA, A <sup>4</sup>                             | 1      | Australia | Liverpool     | 2020 Apr                 |
| PRATTES, J <sup>5,6</sup>                          | 12     | Austria   | Graz          | 2020 Mar - 2021 May      |
| VAN ACKERBROECK, S <sup>7</sup>                    | 14     | Belgium   | Antwerp       | 2020 Feb - 2021 Mar 31   |
| RUTSAERT, L <sup>8</sup>                           | 7      | Belgium   | Antwerp       | 2020 Mar 12 - April 25   |
| JANSSEN, NAF <sup>9</sup>                          | 5      | Belgium   | Bruges        | 2020 Feb 28 - May 27     |
| SARRAZYN, C <sup>10</sup>                          | 4      | Belgium   | Ghent         | 2020 Mar 11 - Apr 17     |
| PRATTES, J – WAUTERS, J,<br>LAGROU, K <sup>5</sup> | 9      | Belgium   | Leuven        | 2020 Mar - 2021 May      |
| JANSSEN, NAF <sup>9</sup>                          | 5      | Belgium   | Roeselare     | 2020 Feb 28 - May 27     |
| SANTANA, MF <sup>11</sup>                          | 1      | Brazil    | Manaus        | 2020                     |
| FARIAS, ME <sup>12</sup>                           | 2      | Brazil    | Manaus        | 2020 Apr - Jul           |
| DE ALMEIDA, JN JR <sup>13</sup>                    | 14     | Brazil    | São Paulo     | 2020 Apr - 2021 Jul      |
| MARTINS, AC <sup>14</sup>                          | 3      | Brazil    | São Paulo     | 2020 Feb - Dec           |
| RABAGLIATI, R <sup>15</sup>                        | 9      | Chile     | Santiago      | 2020 May - Jul           |
| WANG, J <sup>16</sup>                              | 8      | China     | Hangzhou      | 2020 Jan - Mar           |
| FU, Y <sup>17</sup>                                | 1      | China     | Hangzhou      | 2019 - 2020 Feb 29       |
| ZHU, X <sup>18</sup>                               | 60     | China     | Nanjing       | 2020 Jan 22 - Feb 2      |
| JIANG, Z <sup>19</sup>                             | 8      | China     | Shenzhen      | 2020 Jan - Jun           |
| CHEN, N <sup>20</sup>                              | 1      | China     | Wuhan         | 2020 Jan 1 - Jan 20      |
| XU, J <sup>21</sup>                                | 78     | China     | Wuhan         | 2019 Dec 29 – 2020 Apr 1 |
| YANG, X <sup>22</sup>                              | 2      | China     | Wuhan         | 2019 Dec 24 - Jan 26     |
| HAGLUND, A <sup>23</sup>                           | 1      | Denmark   | Aarhus        | 2020                     |
| HELLEBERG, M <sup>24</sup>                         | 2      | Denmark   | Copenhagen    | 2020 Mar 15 - Apr 11     |
| ISMAIEL, WF <sup>25</sup>                          | 6      | Egypt     | Cairo         | 2020                     |
| ROUZÉ, A <sup>26</sup>                             | 14     | Europe    | multinational | 2020 - 2021              |
| JANSSEN, NAF <sup>9</sup>                          | 7      | France    | Amiens        | 2020 Apr 7 - May 31      |
| PRATTES, J – BELLANGER,<br>A-P <sup>5</sup>        | 1      | France    | Besancon      | 2020 Mar - 2021 May      |
| PRATTES, J – DELHAES, L <sup>5</sup>               | 5      | France    | Bordeaux      | 2020 Mar - 2021 May      |
| RAZAZI, K <sup>27</sup>                            | 15     | France    | Creteil       | 2019 Dec - 2020 Apr 29   |
| LESCURE, FX <sup>28</sup>                          | 1      | France    | diverse       | 2020 Jan 24 - 29         |
| GOUZIEN, L <sup>29</sup>                           | 1      | France    | Le Chesnay    | 2020 Mar 1 - Apr 30      |
| JANSSEN, NAF <sup>9</sup>                          | 7      | France    | Lille         | 2020 Apr 7 - May 31      |
| DUPONT, D <sup>30</sup>                            | 19     | France    | Lyon          | 2020 Mar 1 - Apr 11      |
| FEKKAR, A <sup>31</sup>                            | 6      | France    | Paris         | 2020 Mar 6 - Apr 24      |
| GHELFENSTEIN-FERREIRA,<br>T <sup>32</sup>          | 1      | France    | Paris         | 2020                     |
| DELLIÈRE, S <sup>33</sup>                          | 21     | France    | Paris         | 2020 Mar 15 - May 1      |
| BLAIZE, M <sup>34</sup>                            | 1      | France    | Paris         | 2020 Mar                 |

|                                                                     |    |             |                 |                                     |
|---------------------------------------------------------------------|----|-------------|-----------------|-------------------------------------|
| <b>GANGNEUX, JP</b> <sup>35</sup>                                   | 7  | France      | Rennes          | 2020                                |
| <b>REIZINE, F</b> <sup>36</sup>                                     | 10 | France      | Rennes          | 2020 Mar 3 - Sep 9                  |
| <b>JANSSEN, NAF</b> <sup>9</sup>                                    | 7  | France      | Rouen           | 2020 Apr 7 - May 31                 |
| <b>SCHEIN, F</b> <sup>37</sup>                                      | 1  | France      | Saint-Etienne   | 2020 Mar                            |
| <b>VERSYCK, M</b> <sup>38</sup>                                     | 2  | France      | Valenciennes    | 2020 Mar 15 - Apr 30                |
| <b>ICHA, P</b> <sup>39</sup>                                        | 6  | France      | Villejuif       | 2020 Mar 23 - May 4                 |
| <b>LEISTNER, R</b> <sup>40</sup>                                    | 47 | Germany     | Berlin          |                                     |
| <b>PRATTES, J – KÖHLER, P</b> <sup>5</sup>                          | 19 | Germany     | Cologne         | 2020 Mar - 2021 May                 |
| <b>KOEHLER, P</b> <sup>41</sup>                                     | 5  | Germany     | Cologne         | 2020 Mar 7 - Apr 22                 |
| <b>KIRCHHOFF, L</b> <sup>42</sup>                                   | 30 | Germany     | Essen           |                                     |
| <b>ROTHE, K</b> <sup>43</sup>                                       | 9  | Germany     | Munich          | 2020 Feb 16 - Apr 22                |
| <b>PRATTES, J – LAHMER, T</b> <sup>5</sup>                          | 13 | Germany     | Munich          | 2020 Mar - 2021 May                 |
| <b>LAHMER, T</b> <sup>44</sup>                                      | 2  | Germany     | Munich          | 2020                                |
| <b>PRATTES, J – STEINMANN, J</b> <sup>5</sup>                       | 5  | Germany     | Nuremberg       | 2020 Mar - 2021 May                 |
| <b>PRATTES, J – PAUL, G</b> <sup>5</sup>                            | 2  | Germany     | Stuttgart       | 2020 Mar - 2021 May                 |
| <b>PARAMYTHIOTOU, E</b> <sup>45</sup>                               | 4  | Greece      | Athens          | 2020 Mar 22 - Feb 28                |
| <b>NASRI, E</b> <sup>46</sup>                                       | 1  | Iran        | Isfahan         | 2020 Mar                            |
| <b>HAKAMIFARD, A</b> <sup>47</sup>                                  | 1  | Iran        | Isfahan         | 2020 Jun                            |
| <b>GHAZANFARI, M</b> <sup>48</sup>                                  | 22 | Iran        | Sari            | 2020 May 1 - Sep 30                 |
| <b>SALEHI, M</b> <sup>49</sup>                                      | 1  | Iran        | Tehran          | 2020                                |
| <b>ABOLGHAEMI, S</b> <sup>50</sup>                                  | 1  | Iran        | Tehran          | 2020 Oct                            |
| <b>KAKAMAD, FH</b> <sup>51</sup>                                    | 1  | Iraq        | As Sulaymaniyah | 2020                                |
| <b>MOHAMED, A</b> <sup>52</sup>                                     | 1  | Ireland     | Dublin          | 2020                                |
| <b>BARTOLETTI, M</b> <sup>53</sup>                                  | 30 | Italy       | Bologna         | 2020 Feb - Apr                      |
| <b>SIGNORINI, L</b> <sup>54</sup>                                   | 2  | Italy       | Brescia         | 2020 Feb 21 - May 6                 |
| <b>TROVATO, L</b> <sup>55</sup>                                     | 1  | Italy       | Catania         | 2020 Oct                            |
| <b>PRATTES, J – GIACOBBE, DR, ROBBIA, C, PELOSI, P</b> <sup>5</sup> | 5  | Italy       | Genoa           | 2020 Mar - 2021 May                 |
| <b>SALTINI, P</b> <sup>56</sup>                                     | 1  | Italy       | Milan           | 2021                                |
| <b>RIPA, M</b> <sup>57</sup>                                        | 11 | Italy       | Milan           | 2020 Feb 25 - Apr 6                 |
| <b>ANTINORI, S</b> <sup>58</sup>                                    | 1  | Italy       | Milan           | 2020 Mar                            |
| <b>PRATTES, J – VOLPI, S</b> <sup>5</sup>                           | 1  | Italy       | Modena          | 2020 Mar - 2021 May                 |
| <b>FORTAREZZA, F</b> <sup>59</sup>                                  | 9  | Italy       | Padova          | 2020 Mar - Jun, 2020 Oct - 2021 Feb |
| <b>FALCONE, M</b> <sup>60</sup>                                     | 1  | Italy       | Pisa            | 2020 Mar 4 - Apr 30                 |
| <b>OLIVA, A</b> <sup>61</sup>                                       | 1  | Italy       | Rome            | 2020 Mar - Sep                      |
| <b>BRUNO, G</b> <sup>62</sup>                                       | 1  | Italy       | Taranto         | 2020 Mar                            |
| <b>BARATELLA, E</b> <sup>63</sup>                                   | 19 | Italy       | Trieste         | 2020 Mar - 2021 May                 |
| <b>BERLOT, G</b> <sup>64</sup>                                      | 1  | Italy       | Trieste         | 2021                                |
| <b>IWANAGA, Y</b> <sup>65</sup>                                     | 1  | Japan       | Kitakyushu      | 2021                                |
| <b>TAKAZONO, T</b> <sup>66</sup>                                    | 10 | Japan       | National        | 2020 Jan - 2021 Jan 27              |
| <b>IMOTO, W</b> <sup>67</sup>                                       | 1  | Japan       | Osaka           | 2020                                |
| <b>ALBAID, K</b> <sup>68</sup>                                      | 2  | Kuwait      | Kuwait City     | 2020                                |
| <b>VELEZ PINTADO, M</b> <sup>69</sup>                               | 16 | Mexico      | Mexico City     | 2020 Mar 15 - Jul 10                |
| <b>ROMAN-MONTES, CM</b> <sup>70</sup>                               | 14 | Mexico      | Mexico City     | 2020 Apr 13 - Jun 1                 |
| <b>VAN SOMEREN GRÉVE, F</b> <sup>71</sup>                           | 1  | Netherlands | Amsterdam       | 2020                                |
| <b>VAN BIESEN, S</b> <sup>72</sup>                                  | 9  | Netherlands | Amsterdam       | 2020 Apr                            |
| <b>JANSSEN, NAF</b> <sup>9</sup>                                    | 5  | Netherlands | Amsterdam       | 2020 Feb 28 - May 27                |

|                                                          |    |                      |                         |                                        |
|----------------------------------------------------------|----|----------------------|-------------------------|----------------------------------------|
| <b>VAN GROOTVELD, R<sup>73</sup></b>                     | 11 | Netherlands          | Leiden                  | 2020 Apr 1 - May 11                    |
| <b>VAN ARKEL, ALE<sup>74</sup></b>                       | 6  | Netherlands          | Leiden                  | 2020 Mar                               |
| <b>MEIJER, EFJ<sup>75</sup></b>                          | 13 | Netherlands          | Nijmegen                | 2020 Mar - May, 2020 mid-Sep - mid-Dec |
| <b>JANSSEN, NAF<sup>9</sup></b>                          | 5  | Netherlands          | Rotterdam               | 2020 Feb 28 - May 27                   |
| <b>YUSUF, E<sup>76</sup></b>                             | 10 | Netherlands          | Rotterdam               | 2020 Mar 1 - Apr 21                    |
| <b>IQBAL, A<sup>77</sup></b>                             | 61 | Pakistan             | Islamabad               | 2020 Jun - 2021 May                    |
| <b>NASIR, N<sup>78</sup></b>                             | 5  | Pakistan             | Karachi                 | 2020 Feb - Apr                         |
| <b>WACHNICKA-TRUTY, R<sup>79</sup></b>                   | 1  | Poland               | Gdansk                  | 2020                                   |
| <b>RANHEL, D<sup>80</sup></b>                            | 10 | Portugal             | Lisbon                  | 2021 Nov - Feb 15                      |
| <b>ABDALLA, S<sup>81</sup></b>                           | 2  | Qatar                | Doha                    | 2020                                   |
| <b>TOC, DA<sup>82</sup></b>                              | 1  | Romania              | Cluj-Napoca             | 2020/2021                              |
| <b>KLIMKO, N<sup>83</sup></b>                            | 5  | Russia               | Saint Petersburg        | 2020                                   |
| <b>SHADRIVOVA, O<sup>84</sup></b>                        | 45 | Russia               | St. Petersburg          | 2020 Jun - 2021 May                    |
| <b>ALBASATA, H<sup>85</sup></b>                          | 1  | Saudi Arabia         | Riyadh                  | 2020 May                               |
| <b>MARR, KA<sup>86</sup></b>                             | 8  | Spain                | Barcelona               | 2020 Mar - Jun                         |
| <b>GARCIA-VIDAL, C<sup>87</sup></b>                      | 3  | Spain                | Barcelona               | 2020 Feb 28 - Apr 22                   |
| <b>SEGRELLES-CALVO, G<sup>88</sup></b>                   | 7  | Spain                | Madrid                  | 2020 Feb 1 - Apr 30                    |
| <b>PRATTES J – VALERIO, M<sup>5</sup></b>                | 12 | Spain                | Madrid                  | 2020 Mar - 2021 May                    |
| <b>MACHADO, M<sup>89</sup></b>                           | 8  | Spain                | Madrid                  | 2020 Mar 1 - May 31                    |
| <b>FALCES-ROMERO, I<sup>90</sup></b>                     | 10 | Spain                | Madrid                  | 2020 Mar - May                         |
| <b>BARDI, T<sup>91</sup></b>                             | 4  | Spain                | Madrid                  | 2020 Mar - May                         |
| <b>TRUJILLO, H<sup>92</sup></b>                          | 1  | Spain                | Madrid                  | 2020 Apr                               |
| <b>CALDERÓN-PARRA, J<sup>93</sup></b>                    | 28 | Spain                | Majadahonda             | 2020 Mar - 2021 Aug                    |
| <b>GARCÍA CLEMENTE, MG<sup>94</sup></b>                  | 1  | Spain                | Oviedo                  | 2020                                   |
| <b>MARTA, GC<sup>95</sup></b>                            | 35 | Spain                | Oviedo                  | 2020 Mar 1 - Dec 31                    |
| <b>MARTÍN, CS<sup>96</sup></b>                           | 3  | Spain                | Valencia                | 2020 Mar 22 - May 22                   |
| <b>NEBREDA-MAYORAL, T<sup>97</sup></b>                   | 3  | Spain                | Valladolid              | 2020 Mar 1 -31                         |
| <b>SØGAARD, KK<sup>98</sup></b>                          | 1  | Switzerland          | Basel                   | 2020 Feb 25 - May 31                   |
| <b>LAMOTH, F<sup>99</sup></b>                            | 3  | Switzerland          | Lausanne                | 2020 Mar 6 - May 11                    |
| <b>LU, DE<sup>100</sup></b>                              | 1  | Taiwan               | Taipei                  | 2022                                   |
| <b>CHAUVET, P<sup>101</sup></b>                          | 6  | United Arab Emirates | Abu Dhabi               | 2020 Mar 24 - May 25                   |
| <b>MAES, M<sup>102</sup></b>                             | 3  | United Kingdom       | Cambridge               | 2020 Mar 15 - Aug 30                   |
| <b>WHITE, L<sup>103</sup></b>                            | 19 | United Kingdom       | Cardiff                 | 2020/2021                              |
| <b>HUGHES, S<sup>104</sup></b>                           | 3  | United Kingdom       | London                  | 2020 Feb 20 - Apr 20                   |
| <b>PRATTES J - RAUTEMAA-RICHARDSON, R<sup>5</sup></b>    | 2  | United Kingdom       | Manchester              | 2020 Mar - 2021 May                    |
| <b>BORMAN, AM<sup>105</sup></b>                          | 16 | United Kingdom       | Multicenter             | 2020 Mar 11 - Jul 14                   |
| <b>PRATTES, J – JENKS, J<sup>5</sup></b>                 | 1  | United States        | San Diego, California   | 2020 Mar - 2021 May                    |
| <b>WITTING, C<sup>106</sup></b>                          | 1  | United States        | Chicago, Illinois       | 2020                                   |
| <b>PERMPALUNG, N<sup>107</sup>/MARR, KA<sup>86</sup></b> | 39 | United States        | Multicenter, Maryland   | 2020 Mar - Aug                         |
| <b>WASYLYSHYN, AI<sup>108</sup></b>                      | 3  | United States        | Ann Arbor, Michigan     | 2020 Mar 17 - Oct 5                    |
| <b>MITAKA, H<sup>109</sup></b>                           | 4  | United States        | New York City, New York | 2020 Mar 21 - April 22                 |
| <b>PATTI, RK<sup>110</sup></b>                           | 1  | United States        | New York City, New York | 2020                                   |

|                                    |   |               |                             |      |
|------------------------------------|---|---------------|-----------------------------|------|
| <b>NASRULLAH, A</b> <sup>111</sup> | 1 | United States | Pittsburgh,<br>Pennsylvania | 2020 |
| <b>STEENWYK, JL</b> <sup>112</sup> | 1 | United States | Nashville,<br>Tennessee     | 2020 |

## b. CAM

| REFERENCE                            | NUMBER OF CASES | COUNTRY        | CITY          | TIME PERIOD                    |
|--------------------------------------|-----------------|----------------|---------------|--------------------------------|
| ZURL, C <sup>113</sup>               | 1               | Austria        | Graz          | 2020                           |
| BASHER, A <sup>114</sup>             | 1               | Bangladesh     | Dhaka         | 2020                           |
| PAULI, MA <sup>115</sup>             | 1               | Brazil         | Florianopolis | 2021                           |
| BONATES, P <sup>116</sup>            | 1               | Brazil         | Manaus        | 2020                           |
| DO MONTE JR, ES <sup>117</sup>       | 1               | Brazil         | Sao Paulo     | 2020                           |
| VENUGOPAL, A <sup>118</sup>          | 1               | Cambodia       | Phnom Penh    | 2021                           |
| RABAGLIATI, R <sup>15</sup>          | 2               | Chile          | Santiago      | 2020                           |
| ZHU, X <sup>18</sup>                 | 6               | China          | Nanjing       | 2020 Jan 22 - Feb 2            |
| HE, Y <sup>119</sup>                 | 2               | China          | Wuhan         | 2019 Dec 30 - 2020 Feb 29      |
| LYSKOVA, P <sup>114</sup>            | 1               | Czech Republic | Prague        | 2021                           |
| GEISLER CRONE, C <sup>120</sup>      | 1               | Denmark        | Copenhagen    | 2021                           |
| ISMAIEL, WF <sup>25</sup>            | 10              | Egypt          | Cairo         | 2020 Dec                       |
| ALFISHAWY, M <sup>121</sup>          | 21              | Egypt          | Cairo         | 2021 Mar 15 - May 15           |
| SAAD, RH <sup>122</sup>              | 1               | Egypt          | Cairo         | 2021                           |
| ROUSHDY, T <sup>123</sup>            | 4               | Egypt          | Cairo         | 2021 Jan - Apr                 |
| FOUAD, YA <sup>124</sup>             | 6               | Egypt          | Cairo         | 2020 Mar 25 - Sep 25           |
| EL-KHOLY, NH <sup>125</sup>          | 28              | Egypt          | Mansoura      | 2020 Aug - 2020 Dec            |
| RIAD, A <sup>126</sup>               | 8               | Egypt          | Multicenter   | 2021 Apr - May                 |
| BELLANGER, A-P <sup>127</sup>        | 1               | France         | Besancon      | 2020                           |
| DUPONT, D <sup>30</sup>              | 1               | France         | Lyon          | 2020 Mar 1 - Apr 11            |
| FEKKAR, A <sup>31</sup>              | 2               | France         | Paris         | 2020 Mar 6 - Apr 24            |
| MUNIER, AL & DENIS, B <sup>114</sup> | 1               | France         | Paris         | 2021                           |
| BENHADID-BRAHMI, Y <sup>128</sup>    | 1               | France         | Paris         | 2021                           |
| DANION, F <sup>129</sup>             | 17              | France         | National      | 2020 Mar - 2021 Jun 10         |
| SEIDEL, D <sup>130</sup>             | 13              | Germany        | Multicenter   | 2020 Mar - 2021 Jun            |
| SELARKA, L <sup>131</sup>            | 47              | India          | Ahmedabad     | 2021 Jan 3 - Mar 27            |
| DESAI, EJ <sup>132</sup>             | 100             | India          | Ahmedabad     | 2021 Mar - Apr                 |
| KUTE, VB <sup>133</sup>              | 12              | India          | Ahmedabad     | 2020 Mar - Dec, 2021 Apr - May |
| RAVANI, SA <sup>134</sup>            | 19              | India          | Ahmedabad     | 2020 Sep - 2021 Mar            |
| MOORTHY, A <sup>135</sup>            | 18              | India          | Bangalore     | 2020 May - Dec                 |
| NEHARA HR <sup>136</sup>             | 5               | India          | Bikaner       | 2020 Nov - Dec                 |
| SURESH, A <sup>137</sup>             | 37              | India          | Dharwad       | 2020 Jun - 2021 May            |
| DUBEY, S <sup>138</sup>              | 55              | India          | East          | 2021 Apr - Jun                 |
| SAIDHA, PK <sup>139</sup>            | 6               | India          | Gurgaon       | 2020 - 2021                    |
| SHARMA, S <sup>140</sup>             | 23              | India          | Jaipur        | 2020 Aug - Dec                 |
| ARJUN, R <sup>141</sup>              | 10              | India          | Kochi         | 2020 - 2021                    |
| MAHARASHTRA NEWS <sup>142</sup>      | 1,500           | India          | Maharashtra   | 2021 May 20                    |

|                                                      |        |             |                     |                             |
|------------------------------------------------------|--------|-------------|---------------------|-----------------------------|
| <b>DAVE, TV</b> <sup>143</sup>                       | 58     | India       | Multicenter         | 2020 - 2021                 |
| <b>SEN, M</b> <sup>144</sup>                         | 2,826  | India       | Multicenter         | 2020 Jan 1 - 2021<br>May 16 |
| <b>RAUT, A</b> <sup>145</sup>                        | 14,872 | India       | Multicenter         | 2020 - 2021 May 28          |
| <b>SEN, M</b> <sup>146</sup>                         | 6      | India       | Mumbai              | 2020 Aug 1 - Dec 15         |
| <b>PATEL, A</b> <sup>147</sup>                       | 187    | India       | Multicenter         | 2020 Sep - Dec              |
| <b>GUPTA, R</b> <sup>148</sup>                       | 115    | India       | Multicenter         | 2020 - 2021                 |
| <b>RAMASWAMI, A</b> <sup>149</sup>                   | 70     | India       | New Delhi           | 2021 May 6 - Jun 1          |
| <b>ARORA, R</b> <sup>150</sup>                       | 65     | India       | New Delhi           | 2021 Mar - Jun 5            |
| <b>SINGH, Y</b> <sup>151</sup>                       | 13     | India       | New Delhi           | 2020 Nov - 2021<br>Jan      |
| <b>SARKAR, S</b> <sup>152</sup>                      | 10     | India       | Puducherry          | 2020 - 2021                 |
| <b>JOSHI, S</b> <sup>153</sup>                       | 178    | India       | Pune                | 2020 - 2021                 |
| <b>MISHRA, Y</b> <sup>154</sup>                      | 32     | India       | Pune                | 2021 Apr 12 - May<br>31     |
| <b>METHA, R</b> <sup>155</sup>                       | 215    | India       | Raipur              | 2021 May 1 - July<br>15     |
| <b>PIPPAL, SK</b> <sup>156</sup>                     | 80     | India       | Sagar               | 2021 May - Aug              |
| <b>NELWAN, EJ</b> <sup>157</sup>                     | 1      | Indonesia   | Jakarta             | 2021                        |
| <b>AVATEF, FM</b> <sup>158</sup>                     | 12     | Iran        | Kermanshah          | 2021                        |
| <b>ZARRINFAR, H &amp;<br/>FATA, A</b> <sup>114</sup> | 1      | Iran        | Mashhad             | 2020                        |
| <b>PAKDEL, F</b> <sup>159</sup>                      | 15     | Iran        | Tehran, Multicenter | 2020 Apr - Sept             |
| <b>KARIMI-GALOUGHAI,<br/>M</b> <sup>160</sup>        | 1      | Iran        | Tehran              | 2020                        |
| <b>TABARSI, P</b> <sup>161</sup>                     | 1      | Iran        | Tehran              | 2020 - 2021                 |
| <b>VEISI, A</b> <sup>162</sup>                       | 2      | Iran        | Tehran              | 2021                        |
| <b>MOHAMMADI, F</b> <sup>163</sup>                   | 1      | Iran        | Qazvin              | 2021                        |
| <b>OSTOVAN, VR</b> <sup>164</sup>                    | 1      | Iran        | Shiraz              | 2020                        |
| <b>SALTINI, P</b> <sup>56</sup>                      | 1      | Italy       | Milan               | 2021                        |
| <b>PASERO, D</b> <sup>165</sup>                      | 1      | Italy       | Sassari             | 2020 Mar                    |
| <b>ALBAID, K</b> <sup>114</sup>                      | 1      | Kuwait      | Kuwait City         | 2020                        |
| <b>KANJ, S</b> <sup>114</sup>                        | 1      | Lebanon     | Beirut              | 2020                        |
| <b>BONIFAZ, A &amp; ARAIZA,<br/>J</b> <sup>114</sup> | 3      | Mexico      | Mexico City         | 2020                        |
| <b>WAIZEL-HAIAT, S</b> <sup>166</sup>                | 1      | Mexico      | Mexico City         | 2020                        |
| <b>GUZMÁN-CASTRO,<br/>S</b> <sup>167</sup>           | 6      | Mexico      | Morelia             | 2020 May - 2021<br>May      |
| <b>SHRESTHA, O</b> <sup>168</sup>                    | 1      | Nepal       | Biratnagar          | 2021                        |
| <b>KUMAR GUPTA, S</b> <sup>169</sup>                 | 1      | Nepal       | Kathmandu           | 2021                        |
| <b>BUIL, JB</b> <sup>170</sup>                       | 1      | Netherlands | Amsterdam           | 2020 - 2021                 |
| <b>BUIL, JB</b> <sup>170</sup>                       | 1      | Netherlands | Breda               | 2020 - 2021                 |
| <b>BUIL, JB</b> <sup>170</sup>                       | 1      | Netherlands | Ede                 | 2020 - 2021                 |
| <b>BUIL, JB</b> <sup>170</sup>                       | 1      | Netherlands | Leiden              | 2020 - 2021                 |
| <b>MOBEEN, H</b> <sup>171</sup>                      | 1      | Pakistan    | Islamabad           | 2021                        |
| <b>NASIR, N</b> <sup>172</sup>                       | 10     | Pakistan    | Karachi             | 2020 Jul - 2021 May         |
| <b>ALAMIN, MA</b> <sup>173</sup>                     | 1      | Qatar       | Doha                | 2021                        |
| <b>KLIMKO, N</b> <sup>114</sup>                      | 4      | Russia      | Saint Petersburg    | 2020                        |
| <b>ARANA, C</b> <sup>174</sup>                       | 2      | Spain       | Barcelona           | 2020                        |
| <b>LAI, CC</b> <sup>175</sup>                        | 1      | Taiwan      | Tainan City         | 2021                        |
| <b>MALEK, I</b> <sup>176</sup>                       | 1      | Tunisia     | Tunis               | 2021                        |

|                                             |    |                |                           |                         |
|---------------------------------------------|----|----------------|---------------------------|-------------------------|
| <b>DEMIROĞU, YZ<sup>177</sup></b>           | 2  | Turkey         | Adana                     | 2021                    |
| <b>BAYRAM, N<sup>178</sup></b>              | 11 | Turkey         | Kayseri                   | 2020 Mar - Dec          |
| <b>SARGIN, F<sup>179</sup></b>              | 1  | Turkey         | Pamukkale                 | 2020                    |
| <b>DILEK, A<sup>180</sup></b>               | 1  | Turkey         | Samsun                    | 2021                    |
| <b>HANLEY, B<sup>181</sup></b>              | 1  | United Kingdom | London                    | 2020 March 1 - April 30 |
| <b>KRISHNA, V<sup>182</sup></b>             | 1  | United Kingdom | London                    | 2020 Apr                |
| <b>PLACIK, D<sup>183</sup></b>              | 1  | United States  | Yuma, Arizona             | 2020                    |
| <b>JOHNSON, A<sup>184</sup></b>             | 1  | United States  | Riverside, California     | 2021                    |
| <b>DALLALZADEH, LO<sup>185</sup></b>        | 2  | United States  | San Diego, California     | 2020                    |
| <b>MEKONNEN, Z<sup>186</sup></b>            | 1  | United States  | San Francisco, California | 2020                    |
| <b>KANWAR, A<sup>187</sup></b>              | 1  | United States  | Lewes, Delaware           | 2020                    |
| <b>ALEKSEYEV, K<sup>188</sup></b>           | 1  | United States  | Dover, Delaware           | 2020                    |
| <b>WERTHMAN-EHRENREICH, A<sup>189</sup></b> | 1  | United States  | Buffalo, New York         | 2020                    |
| <b>KHATRI, A<sup>190</sup></b>              | 2  | United States  | Manhasset, New York       | 2020                    |
| <b>ELHAMAMSY, S<sup>191</sup></b>           | 3  | United States  | Providence, Rhode Island  | 2020 - 2021             |
| <b>KHAN, N<sup>192</sup></b>                | 1  | United States  | San Antonio, Texas        | 2020                    |
| <b>SOUQUETT GIL, M<sup>193</sup></b>        | 1  | Venezuela      | Merida                    | 2021                    |
| <b>SOUQUETT GIL, M<sup>193</sup></b>        | 3  | Venezuela      | Valencia                  | 2021                    |

8

9

| REFERENCE                         | NUMBER OF CASES             | COMMENT         | COUNTRY     | CITY                 | TIME PERIOD              |
|-----------------------------------|-----------------------------|-----------------|-------------|----------------------|--------------------------|
| BENEDETT, MF <sup>194</sup>       | 1                           | CAC             | Argentina   | Buenos Aires         | 2022                     |
| SEITZ, T <sup>195</sup>           | 1                           | CAC             | Austria     | Vienna               | 2020                     |
| SAEED, NK <sup>196</sup>          | 30                          | CAC             | Bahrain     | Manama               | 2020 Feb - Oct           |
| DE ALMEIDA, JN <sup>197,198</sup> | 3<br>(+ 9<br>colonizations) | <i>C. auris</i> | Brazil      | Salvador             | 2020 Dec 7 - 30          |
| SILVA, DL <sup>199</sup>          | 2                           | CAC             | Brazil      | Belo Horizonte       | 2020 May - Nov           |
| RICHE, CVW <sup>200</sup>         | 11                          | CAC             | Brazil      | Porto Alegre         | 2020                     |
| NUCCI, M <sup>201</sup>           | 9                           | CAC             | Brazil      | Rio de Janeiro       | 2020 Jan - Feb           |
| MARTINS, AC <sup>14</sup>         | 4                           | CAC             | Brazil      | São Paulo            | 2020 Feb - Dec           |
| ZHANG, J <sup>202</sup>           | 2                           | CAC             | China       | Hangzhou             | 2020 Feb 12 - Mar 24     |
| ZHU, X <sup>18</sup>              | 2                           | CAC             | China       | Nanjing              | 2020 Jan 22 - Feb 2      |
| CHEN, N <sup>20</sup>             | 4                           | CAC             | China       | Wuhan                | 2020 Jan 1 - Jan 20      |
| SANG, L <sup>203</sup>            | 6                           | CAC             | China       | Wuhan                | 2020 Jan 18 - Apr 26     |
| RODRIGUEZ, JY <sup>204</sup>      | 6<br>(+ 2<br>colonizations) | <i>C. auris</i> | Colombia    | Northern Region      | 2020 Jun - Sept          |
| RODRIGUEZ, JY <sup>204</sup>      | 13                          | CAC             | Colombia    | Northern region      | 2020 Jun - Sep           |
| SOLANO LEIVA, I <sup>205</sup>    | 2                           | <i>C. auris</i> | El Salvador | San Salvador         | 2020 Feb                 |
| RAMADAN, HK <sup>206</sup>        | 5                           | CAC             | Egypt       | Assiut               | 2020 May 3 - Jun 30      |
| BRETAGNE, S <sup>207</sup>        | 75                          | CAC             | France      | national multicentre | 2020 - 2021              |
| BUETTI, N <sup>208</sup>          | 4                           | CAC             | France      | Paris                | 2020 Jan 29 - Oct 3      |
| WIESE-POSSELT, M <sup>209</sup>   | 1<br>(+ 1 colonization)     | <i>C. auris</i> | Germany     | Berlin               | 2021 Jan - Mar           |
| SPILIOPOULOU, A <sup>210</sup>    | 1                           | CAC             | Greece      | Patras               | 2021                     |
| PAHO REPORT <sup>211</sup>        | 2                           | <i>C. auris</i> | Guatemala   | UNK                  | 2020 Jun - Sep           |
| SZABO, BG <sup>212</sup>          | 7                           | CAC             | Hungary     | Budapest             | 2020 Mar - Jun           |
| CHOWDHARY, A <sup>213</sup>       | 10                          | <i>C. auris</i> | India       | New Delhi            | 2020 Apr - Jul           |
| RAJNI, E <sup>214</sup>           | 14                          | <i>C. auris</i> | India       | Rajasthan            | 2020 Aug - 2021 Jan      |
| AGARWAL, M <sup>215</sup>         | 1                           | CAC (eye)       | India       | Bengaluru            |                          |
| SURESH, A <sup>137</sup>          | 1                           | CAC             | India       | Dharwad              | 2020 Jun - 2021 May      |
| NIYAS, VKM <sup>216</sup>         | 1                           | <i>C. auris</i> | India       | Kerala               | 2020 Jul 5 - 2021 Feb 28 |
| NIYAS, VKM <sup>216</sup>         | 3                           | CAC             | India       | Kerala               | 2020 Jul 5 - 2021 Feb 28 |
| CHOWDHARY, A <sup>213</sup>       | 5                           | CAC             | India       | New Delhi            | 2020 Apr - Jul           |
| SHROFF, D <sup>217</sup>          | 4                           | CAC             | India       | New Delhi            | 2020 May 2021 Jan        |
| BHAGALI, R <sup>218</sup>         | 1                           | CAC             | India       | Pune                 |                          |



|                                           |                          |                 |           |             |                                           |
|-------------------------------------------|--------------------------|-----------------|-----------|-------------|-------------------------------------------|
| <b>RAJNI, E<sup>214</sup></b>             | 14                       | <i>C. auris</i> | India     | Rajasthan   | 2020 Aug - 2021 Jan                       |
| <b>RAJNI, E<sup>214</sup></b>             | 19                       | CAC             | India     | Rajasthan   | 2020 Aug - 2021 Jan                       |
| <b>GOYAL, M<sup>219</sup></b>             | 1                        | CAC             | India     | Telangana   |                                           |
| <b>SARI, AP<sup>220</sup></b>             | 1                        | CAC             | Indonesia | Jakarta     |                                           |
| <b>ARASTEHFAR, A<sup>221</sup></b>        | 6                        | CAC             | Iran      | Mashhad     | 2020 Nov - 2021 Jan                       |
| <b>DAVOODI, L<sup>222</sup></b>           | 1                        | CAC             | Iran      | Sari        | 2020 Jul                                  |
|                                           |                          | CAC             | Iran      |             |                                           |
| <b>HEBERT, J<sup>223</sup></b>            | 1                        | CAC             | Ireland   | Dublin      |                                           |
| <b>BRIKMAN, S<sup>224</sup></b>           | 3                        | CAC             | Israel    | Afula       | 2020 Jun 15 - Sep 20                      |
| <b>AYALON, O<sup>225</sup></b>            | 11                       | CAC             | Israel    | Jerusalem   | 2020 Sep 1 - Nov 30 & 2021 Dec 1 - Mar 31 |
| <b>MAGNASCO, L<sup>226</sup></b>          | 4<br>(+ 2 colonizations) | <i>C. auris</i> | Italy     | Genoa       | 2020 Feb 28 - May 31                      |
| <b>DI PILATO, V<sup>227</sup></b>         | UNK (1 – 5)              | <i>C. auris</i> | Italy     | Genoa       | 2019 Jul – 2020 May                       |
| <b>SIGNORINI, L<sup>54</sup></b>          | 5                        | CAC             | Italy     | Brescia     | 2020 Feb 21 - May 6                       |
| <b>CULTRERA, R<sup>229</sup></b>          | 6                        | CAC             | Italy     | Ferrara     | 2020 Feb 22 - Apr 30                      |
| <b>ANTINORI, S<sup>230</sup></b>          | 3                        | CAC             | Italy     | Milan       | 2020 Mar 10 - 18                          |
| <b>MASTRANGELO, A<sup>231</sup></b>       | 21                       | CAC             | Italy     | Milan       | 2020 Feb 15 - Jun 30                      |
| <b>POSTERARO, B<sup>232</sup></b>         | 8                        | CAC             | Italy     | Rome        | 2020 Mar 1 - May 31                       |
| <b>GIACOBBE, DR<sup>233</sup></b>         | 3                        | CAC             | Italy     | San Martino | 2020 Feb 20 - Apr 10                      |
| <b>YAMAMOTO, K<sup>234</sup></b>          | 1                        | CAC             | Japan     | Okayama     |                                           |
| <b>BABA, H<sup>235</sup></b>              | 1                        | CAC             | Japan     | Sendai      |                                           |
| <b>ALLAW, F<sup>236</sup></b>             | 4<br>(+ 3 colonizations) | <i>C. auris</i> | Lebanon   | Beirut      | 2020 Oct 7 - Dec 30                       |
| <b>AWADA, B<sup>237</sup></b>             | 1                        | CAC             | Lebanon   | Beirut      |                                           |
| <b>VILLANUEVA-LOZANO, H<sup>238</sup></b> | 12                       | <i>C. auris</i> | Mexico    | Nuevo Leon  | 2020 Aug                                  |
| <b>AL-HATMI, AMS<sup>239</sup></b>        | 5                        | CAC             | Oman      | Muscat      | 2020                                      |
| <b>MOIN, S<sup>240</sup></b>              | 4                        | <i>C. auris</i> | Pakistan  | Karachi     | 2020 Apr - Dec                            |
| <b>MOIN, S<sup>241</sup></b>              | 22                       | CAC             | Pakistan  | Karachi     | 2020 Apr - Dec                            |
| <b>PAHO REPORT<sup>211</sup></b>          | (108 isolates)           | <i>C. auris</i> | Panama    | national    | 2020 Jun - Sept                           |
| <b>PAHO REPORT<sup>211</sup></b>          | 1                        | <i>C. auris</i> | Peru      | Lima        | 2020 Jun - Sep                            |
| <b>MIRANDA, MA<sup>242</sup></b>          | 1                        | CAC             | Portugal  | Cascais     |                                           |
| <b>OMRANI, AS<sup>243</sup></b>           | 7                        | <i>C. auris</i> | Qatar     | Doha        | March 1, 2020 and April 30, 2021          |
| <b>GORAVEY, W<sup>244</sup></b>           | 1                        | <i>C. auris</i> | Qatar     | Doha        | 0                                         |
| <b>OMRANI, AS<sup>243</sup></b>           | 77                       | CAC             | Qatar     | Doha        | 2020 Mar 1 - 2021 Apr 30                  |

|                                                         |                                 |                 |                         |                   |                              |
|---------------------------------------------------------|---------------------------------|-----------------|-------------------------|-------------------|------------------------------|
| KLIMKO, N,<br>KOZLOVA O <sup>245</sup>                  | 60                              | CAC             | Russia                  | St.<br>Petersburg | 2020 Mar –<br>2022 Mar       |
| AL ARGAN, RJ <sup>246</sup>                             | 1                               | CAC             | Saudi Arabia            | Khobar            |                              |
| ALFONSO-SANCHEZ,<br>JL <sup>247</sup>                   | 14                              | <i>C. auris</i> | Spain                   | Valencia          | 2020 Feb - 2021<br>Feb       |
| SEGRELLES-CALVO,<br>G <sup>249</sup>                    | 3                               | CAC             | Spain                   | Madrid            | 2020 Feb 1 - Apr<br>30       |
| GOROSPE-SARASÚA,<br>L <sup>250</sup>                    | 1                               | CAC             | Spain                   | Madrid            |                              |
| MORENO-GÓMEZ,<br>LM <sup>251</sup>                      | 1                               | CAC             | Spain                   | Madrid            |                              |
| KALUARACHCHI, S <sup>252</sup>                          | 1                               | CAC (eye)       | Sri Lanka               | Colombo           |                              |
| KÖMEÇ, S <sup>253</sup>                                 | 1 (+ 2 non-<br>COVID-19)        | <i>C. auris</i> | Turkey                  | Istanbul          | 2020 Nov - 2021<br>Jan       |
| BÖLÜKBAŞI, Y <sup>254</sup>                             | 1                               | <i>C. auris</i> | Turkey                  | Istanbul          |                              |
| KAYAASLAN, B <sup>255</sup>                             | 105                             | CAC             | Turkey                  | Ankara            | 2020 Mar 1 -<br>2021 Mar 1   |
| COŞKUN, AS <sup>256</sup>                               | 15                              | CAC             | Turkey                  | Antalya           | 2020 Mar 13 -<br>2021 Jan 02 |
| GÖRKEM, A <sup>257</sup>                                | 1                               | CAC             | Turkey                  | Kayseri           |                              |
| SENOK, A <sup>258</sup>                                 | 1                               | <i>C. auris</i> | United Arab<br>Emirates | Dubai             | 2020 Feb 1 - Jul<br>31       |
| WHITE, L <sup>259</sup>                                 | 7                               | CAC             | United<br>Kingdom       | Cardiff           | 2020 - 2021                  |
| CLOUGH, N <sup>260</sup>                                | 5                               | CAC             | United<br>Kingdom       | London            | 2020 Feb - Apr               |
| HUGHES, S <sup>104</sup>                                | 3                               | CAC             | United<br>Kingdom       | London            | 2020 Feb 20 -<br>Apr 30      |
| HANSON, BM <sup>228</sup>                               | 12                              | <i>C. auris</i> | United States           | Miami             | 2020 Summer                  |
| JEFFERSON, E <sup>261</sup>                             | 1                               | <i>C. auris</i> | United States           | San Diego         | 2020 Mar                     |
| PRESTEL,<br>C <sup>262</sup> /HANSON, BM <sup>228</sup> | 9<br>(+ 25<br>colonizations)/12 | <i>C. auris</i> | United States           | Miami             | 2020 Jun - Sept              |
| KORDALEWSKA, M <sup>263</sup>                           | 11                              | CAC             | United States           | Nutley            | 2020 Apr - May               |
| BISHBURG, E <sup>264</sup>                              | 8                               | CAC             | United States           | New Jersey        | 2020                         |
| MIRCHIN, R <sup>265</sup>                               | 1                               | CAC             | United States           | New York          |                              |
| NORI, P <sup>266</sup>                                  | 8                               | CAC             | United States           | New York          | 2020 Mar 1 -<br>Apr 18       |
| STURM, LK <sup>267</sup>                                | 21                              | CAC             | United States           | Saint Louis       | 2020 Mar 1 -<br>2021 Apr 30  |
| ALATABY, H <sup>268</sup>                               | 1                               | CAC             | United States           | Staten Island     |                              |
| MACAULEY, P <sup>269</sup>                              | 12                              | CAC             | United States           | Valhalla          | 2019 Dec - 2020<br>Oct       |
| SEAGLE, EE <sup>270</sup>                               | 251                             | CAC             | United States           | National          | 2020 Apr - Aug               |

## 11 References

- 12 1. Fernandez NB, Caceres DH, Beer KD, et al. Ventilator-associated pneumonia involving  
13 *Aspergillus flavus* in a patient with coronavirus disease 2019 (COVID-19) from Argentina. *Med*  
14 *Mycol Case Rep* 2021; **31**: 19-23.
- 15 2. Benedetti MF, Alava KH, Sagardia J, et al. COVID-19 associated pulmonary aspergillosis in  
16 ICU patients: Report of five cases from Argentina. *Med Mycol Case Rep* 2021; **31**: 24-8.
- 17 3. Sasoni N, Rodriguez Muller M, Posse G, Gonzalez J, Leonardelli F, Garcia-Effron G. SARS-  
18 CoV-2 and *Aspergillus section Fumigati* coinfection in an immunocompetent patient treated with  
19 corticosteroids. *Rev Iberoam Micol* 2021; **38**(1): 16-8.

- 20 4. Sharma A, Hofmeyr A, Bansal A, et al. COVID-19 associated pulmonary aspergillosis (CAPA):  
21 An Australian case report. *Med Mycol Case Rep* 2021; **31**: 6-10.
- 22 5. Prattes J, Wauters J, Giacobbe DR, et al. Risk factors and outcome of pulmonary  
23 aspergillosis in critically ill coronavirus disease 2019 patients- a multinational observational study  
24 by the European Confederation of Medical Mycology. *Clin Microbiol Infect* 2021.
- 25 6. Prattes J, Valentin T, Hoenigl M, Talakic E, Reisinger AC, Eller P. Invasive pulmonary  
26 aspergillosis complicating COVID-19 in the ICU - A case report. *Med Mycol Case Rep* 2021; **31**: 2-5.
- 27 7. Van Ackerbroeck S, Rutsaert L, Roelant E, Dillen K, Wauters J, Van Regenmortel N. Inhaled  
28 liposomal amphotericin-B as a prophylactic treatment for COVID-19-associated pulmonary  
29 aspergillosis/aspergillus tracheobronchitis. *Crit Care* 2021; **25**(1): 298.
- 30 8. Rutsaert L, Steinfors N, Van Hunsel T, et al. COVID-19-associated invasive pulmonary  
31 aspergillosis. *Ann Intensive Care* 2020; **10**(1): 71.
- 32 9. Janssen NAF, Nyga R, Vanderbeke L, et al. Multinational Observational Cohort Study of  
33 COVID-19-Associated Pulmonary Aspergillosis(1). *Emerg Infect Dis* 2021; **27**(11): 2892-8.
- 34 10. Sarrazyn C, Dhaese S, Demey B, Vandecasteele S, Reynders M, Van Praet JT. Incidence, risk  
35 factors, timing, and outcome of influenza versus COVID-19-associated putative invasive  
36 aspergillosis. *Infect Control Hosp Epidemiol* 2021; **42**(9): 1149-50.
- 37 11. Santana MF, Pivoto G, Alexandre MAA, et al. Confirmed Invasive Pulmonary Aspergillosis  
38 and COVID-19: the value of postmortem findings to support antemortem management. *Rev Soc*  
39 *Bras Med Trop* 2020; **53**: e20200401.
- 40 12. Farias ME, Santana MF, Ferreira L, et al. COVID-19-Associated Pulmonary Aspergillosis in a  
41 Series of Complete Autopsies from the Brazilian Amazon. *Am J Trop Med Hyg* 2022; **106**(2): 571-3.
- 42 13. de Almeida JN, Jr., Doi AM, Watanabe MJL, et al. COVID-19-associated aspergillosis in a  
43 Brazilian referral centre: Diagnosis, risk factors and outcomes. *Mycoses* 2022.
- 44 14. Martins AC, Psaltikidis EM, de Lima TC, et al. COVID-19 and invasive fungal coinfections: A  
45 case series at a Brazilian referral hospital. *J Mycol Med* 2021; **31**(4): 101175.
- 46 15. Rabagliati R, Rodriguez N, Nunez C, Huete A, Bravo S, Garcia P. COVID-19-Associated Mold  
47 Infection in Critically Ill Patients, Chile. *Emerg Infect Dis* 2021; **27**(5): 1454-6.
- 48 16. Wang J, Yang Q, Zhang P, Sheng J, Zhou J, Qu T. Clinical characteristics of invasive  
49 pulmonary aspergillosis in patients with COVID-19 in Zhejiang, China: a retrospective case series.  
50 *Crit Care* 2020; **24**(1): 299.
- 51 17. Fu Y, Yang Q, Xu M, et al. Secondary Bacterial Infections in Critical Ill Patients With  
52 Coronavirus Disease 2019. *Open Forum Infect Dis* 2020; **7**(6): ofaa220.
- 53 18. Zhu X, Ge Y, Wu T, et al. Co-infection with respiratory pathogens among COVID-2019 cases.  
54 *Virus Res* 2020; **285**: 198005.
- 55 19. Jiang Z, Chen S, Zhu Q, Xiao Y, Qu J. COVID-19-associated pulmonary aspergillosis in a  
56 tertiary care center in Shenzhen City. *J Infect Public Health* 2022; **15**(2): 222-7.
- 57 20. Chen N, Zhou M, Dong X, et al. Epidemiological and clinical characteristics of 99 cases of  
58 2019 novel coronavirus pneumonia in Wuhan, China: a descriptive study. *Lancet* 2020; **395**(10223):  
59 507-13.
- 60 21. Xu J, Yang X, Lv Z, et al. Risk Factors for Invasive Aspergillosis in Patients Admitted to the  
61 Intensive Care Unit With Coronavirus Disease 2019: A Multicenter Retrospective Study. *Front Med*  
62 *(Lausanne)* 2021; **8**: 753659.
- 63 22. Yang X, Yu Y, Xu J, et al. Clinical course and outcomes of critically ill patients with SARS-CoV-  
64 2 pneumonia in Wuhan, China: a single-centered, retrospective, observational study. *Lancet Respir*  
65 *Med* 2020; **8**(5): 475-81.
- 66 23. Haglund A, Christensen S, Kristensen L, Gertsen JB, Buus L, Lausch KR. Invasive pulmonary  
67 aspergillosis and hyperthermia in an immunocompetent patient with COVID-19. *Med Mycol Case*  
68 *Rep* 2021; **31**: 29-31.
- 69 24. Helleberg M, Steensen M, Arendrup MC. Invasive aspergillosis in patients with severe  
70 COVID-19 pneumonia. *Clin Microbiol Infect* 2021; **27**(1): 147-8.
- 71 25. Ismaiel WF, Abdelazim MH, Eldsoky I, et al. The impact of COVID-19 outbreak on the  
72 incidence of acute invasive fungal rhinosinusitis. *Am J Otolaryngol* 2021; **42**(6): 103080.

- 73 26. Rouze A, Lemaitre E, Martin-Loeches I, et al. Invasive pulmonary aspergillosis among  
74 intubated patients with SARS-CoV-2 or influenza pneumonia: a European multicenter comparative  
75 cohort study. *Crit Care* 2022; **26**(1): 11.
- 76 27. Razazi K, Arrestier R, Haudebourg AF, et al. Risks of ventilator-associated pneumonia and  
77 invasive pulmonary aspergillosis in patients with viral acute respiratory distress syndrome related  
78 or not to Coronavirus 19 disease. *Crit Care* 2020; **24**(1): 699.
- 79 28. Lescure FX, Bouadma L, Nguyen D, et al. Clinical and virological data of the first cases of  
80 COVID-19 in Europe: a case series. *Lancet Infect Dis* 2020; **20**(6): 697-706.
- 81 29. Gouzien L, Cocherie T, Eloy O, et al. Invasive Aspergillosis associated with Covid-19: A word  
82 of caution. *Infect Dis Now* 2021; **51**(4): 383-6.
- 83 30. Dupont D, Menotti J, Turc J, et al. Pulmonary aspergillosis in critically ill patients with  
84 Coronavirus Disease 2019 (COVID-19). *Med Mycol* 2021; **59**(1): 110-4.
- 85 31. Fekkar A, Lampros A, Mayaux J, et al. Occurrence of Invasive Pulmonary Fungal Infections in  
86 Patients with Severe COVID-19 Admitted to the ICU. *Am J Respir Crit Care Med* 2021; **203**(3): 307-  
87 17.
- 88 32. Ghelfenstein-Ferreira T, Saade A, Alanio A, et al. Recovery of a triazole-resistant *Aspergillus*  
89 *fumigatus* in respiratory specimen of COVID-19 patient in ICU - A case report. *Med Mycol Case Rep*  
90 2021; **31**: 15-8.
- 91 33. Delliere S, Dudoignon E, Fodil S, et al. Risk factors associated with COVID-19-associated  
92 pulmonary aspergillosis in ICU patients: a French multicentric retrospective cohort. *Clin Microbiol*  
93 *Infect* 2020.
- 94 34. Blaize M, Mayaux J, Nabet C, et al. Fatal Invasive Aspergillosis and Coronavirus Disease in an  
95 Immunocompetent Patient. *Emerg Infect Dis* 2020; **26**(7): 1636-7.
- 96 35. Gangneux JP, Reizine F, Guegan H, et al. Is the COVID-19 Pandemic a Good Time to Include  
97 *Aspergillus* Molecular Detection to Categorize Aspergillosis in ICU Patients? A Monocentric  
98 Experience. *J Fungi (Basel)* 2020; **6**(3).
- 99 36. Reizine F, Pinceaux K, Lederlin M, et al. Influenza- and COVID-19-Associated Pulmonary  
100 Aspergillosis: Are the Pictures Different? *J Fungi (Basel)* 2021; **7**(5).
- 101 37. Schein F, Munoz-Pons H, Mahinc C, Grange R, Cathebras P, Flori P. Fatal aspergillosis  
102 complicating severe SARS-CoV-2 infection: A case report. *J Mycol Med* 2020; **30**(4): 101039.
- 103 38. Versyck M, Zarrougui W, Lambiotte F, Elbeki N, Saint-Leger P. Invasive pulmonary  
104 aspergillosis in COVID-19 critically ill patients: Results of a French monocentric cohort. *J Mycol Med*  
105 2021; **31**(2): 101122.
- 106 39. Ichai P, Saliba F, Baune P, Daoud A, Coilly A, Samuel D. Impact of negative air pressure in  
107 ICU rooms on the risk of pulmonary aspergillosis in COVID-19 patients. *Crit Care* 2020; **24**(1): 538.
- 108 40. Leistner R, Schroeter L, Adam T, et al. Corticosteroids as risk factor for COVID-19-associated  
109 pulmonary aspergillosis in intensive care patients. *Crit Care* 2022; **26**(1): 30.
- 110 41. Koehler P, Cornely OA, Böttiger BW, et al. COVID-19 Associated Pulmonary Aspergillosis.  
111 *Mycoses* 2020.
- 112 42. Kirchhoff L, Braun LM, Schmidt D, et al. COVID-19-associated pulmonary aspergillosis in ICU  
113 patients in a German reference centre: Phenotypic and molecular characterisation of *Aspergillus*  
114 *fumigatus* isolates. *Mycoses* 2022.
- 115 43. Rothe K, Feihl S, Schneider J, et al. Rates of bacterial co-infections and antimicrobial use in  
116 COVID-19 patients: a retrospective cohort study in light of antibiotic stewardship. *Eur J Clin*  
117 *Microbiol Infect Dis* 2021; **40**(4): 859-69.
- 118 44. Lahmer T, Rasch S, Spinner C, Geisler F, Schmid RM, Huber W. Invasive pulmonary  
119 aspergillosis in severe coronavirus disease 2019 pneumonia. *Clin Microbiol Infect* 2020; **26**(10):  
120 1428-9.
- 121 45. Paramythiotou E, Dimopoulos G, Koliakos N, et al. Epidemiology and Incidence of COVID-19-  
122 Associated Pulmonary Aspergillosis (CAPA) in a Greek Tertiary Care Academic Reference Hospital.  
123 *Infect Dis Ther* 2021; **10**(3): 1779-92.
- 124 46. Nasri E, Shoaie P, Vakili B, et al. Fatal Invasive Pulmonary Aspergillosis in COVID-19 Patient  
125 with Acute Myeloid Leukemia in Iran. *Mycopathologia* 2020; **185**(6): 1077-84.

- 126 47. Hakamifard A, Hashemi M, Fakhim H, Aboutalebian S, Hajiahmadi S, Mohammadi R. Fatal  
127 disseminated aspergillosis in an immunocompetent patient with COVID-19 due to *Aspergillus*  
128 *ochraceus*. *J Mycol Med* 2021; **31**(2): 101124.
- 129 48. Ghazanfari M, Arastehfar A, Davoodi L, et al. Pervasive but Neglected: A Perspective on  
130 COVID-19-Associated Pulmonary Mold Infections Among Mechanically Ventilated COVID-19  
131 Patients. *Front Med (Lausanne)* 2021; **8**: 649675.
- 132 49. Salehi M, Khajavirad N, Seifi A, et al. Proven *Aspergillus flavus* pulmonary aspergillosis in a  
133 COVID-19 patient: A case report and review of the literature. *Mycoses* 2021; **64**(8): 809-16.
- 134 50. Abolghasemi S, Hakamifard A, Sharifynia S, Pourabdollah Toutkaboni M, Azhdari Tehrani H.  
135 Fatal invasive pulmonary aspergillosis in an immunocompetent patient with COVID-19 due to  
136 *Aspergillus terreus*: A case study. *Clin Case Rep* 2021; **9**(4): 2414-8.
- 137 51. Kakamad FH, Mahmood SO, Rahim HM, et al. Post covid-19 invasive pulmonary  
138 aspergillosis: A case report. *Int J Surg Case Rep* 2021; **82**: 105865.
- 139 52. Mohamed A, Hassan T, Trzos-Grzybowska M, et al. Multi-triazole-resistant *Aspergillus*  
140 *fumigatus* and SARS-CoV-2 co-infection: A lethal combination. *Med Mycol Case Rep* 2021; **31**: 11-4.
- 141 53. Bartoletti M, Pascale R, Cricca M, et al. Epidemiology of invasive pulmonary aspergillosis  
142 among COVID-19 intubated patients: a prospective study. *Clin Infect Dis* 2020.
- 143 54. Signorini L, Moioli G, Calza S, et al. Epidemiological and Clinical Characterization of  
144 Superinfections in Critically Ill Coronavirus Disease 2019 Patients. *Crit Care Explor* 2021; **3**(6): e0430.
- 145 55. Trovato L, Calvo M, Migliorisi G, Astuto M, Oliveri F, Oliveri S. Fatal VAP-related pulmonary  
146 aspergillosis by *Aspergillus niger* in a positive COVID-19 patient. *Respir Med Case Rep* 2021; **32**:  
147 101367.
- 148 56. Saltini P, Palomba E, Castelli V, et al. Mucormycosis in CAPA, a Possible Fungal Super-  
149 Infection. *J Fungi (Basel)* 2021; **7**(9).
- 150 57. Ripa M, Galli L, Poli A, et al. Secondary infections in patients hospitalized with COVID-19:  
151 incidence and predictive factors. *Clin Microbiol Infect* 2021; **27**(3): 451-7.
- 152 58. Antinori S, Rech R, Galimberti L, et al. Invasive pulmonary aspergillosis complicating SARS-  
153 CoV-2 pneumonia: A diagnostic challenge. *Travel Med Infect Dis* 2020; **38**: 101752.
- 154 59. Fortarezza F, Boscolo A, Pezzuto F, et al. Proven COVID-19-associated pulmonary  
155 aspergillosis in patients with severe respiratory failure. *Mycoses* 2021; **64**(10): 1223-9.
- 156 60. Falcone M, Tiseo G, Giordano C, et al. Predictors of hospital-acquired bacterial and fungal  
157 superinfections in COVID-19: a prospective observational study. *J Antimicrob Chemother* 2021;  
158 **76**(4): 1078-84.
- 159 61. Oliva A, Ceccarelli G, Borrazzo C, et al. Comparison of clinical features and outcomes in  
160 COVID-19 and influenza pneumonia patients requiring intensive care unit admission. *Infection* 2021;  
161 **49**(5): 965-75.
- 162 62. Bruno G, Fabrizio C, Buccoliero GB. COVID-19-associated pulmonary aspergillosis: adding  
163 insult to injury. *Lancet Microbe* 2020; **1**(3): e106.
- 164 63. Baratella E, Roman-Pognuz E, Zerbato V, et al. Potential links between COVID-19-associated  
165 pulmonary aspergillosis and bronchiectasis as detected by high resolution computed tomography.  
166 *Front Biosci (Landmark Ed)* 2021; **26**(12): 1607-12.
- 167 64. Berlot G, Tomasini A, Bussani R. Diffuse aspergillosis in a patient with SARS-CoV-2  
168 pneumonia. *Intensive Care Med* 2021.
- 169 65. Iwanaga Y, Kawanami T, Yamasaki K, et al. A fatal case of COVID-19-associated invasive  
170 pulmonary aspergillosis. *J Infect Chemother* 2021; **27**(7): 1102-7.
- 171 66. Takazono T, Mukae H, Izumikawa K, Hasegawa N, Yokoyama A. COVID-19 associated  
172 pulmonary aspergillosis: a nationwide survey by the Japanese Respiratory Society. *ERJ Open Res*  
173 2021; **7**(4).
- 174 67. Imoto W, Himura H, Matsuo K, et al. COVID-19-associated pulmonary aspergillosis in a  
175 Japanese man: A case report. *J Infect Chemother* 2021; **27**(6): 911-4.
- 176 68. Alobaid K, Yousuf B, Al-Qattan E, Muqeem Z, Al-Subaie N. Pulmonary aspergillosis in two  
177 COVID-19 patients from Kuwait. *Access Microbiol* 2021; **3**(3): 000201.

- 178 69. Velez Pintado M, Camiro-Zuniga A, Aguilar Soto M, et al. COVID-19-associated invasive  
179 pulmonary aspergillosis in a tertiary care center in Mexico City. *Med Mycol* 2021; **59**(8): 828-33.
- 180 70. Roman-Montes CM, Martinez-Gamboa A, Diaz-Lomeli P, et al. Accuracy of galactomannan  
181 testing on tracheal aspirates in COVID-19-associated pulmonary aspergillosis. *Mycoses* 2021; **64**(4):  
182 364-71.
- 183 71. van Someren Greve F, du Long R, Talwar R, Beurskens CJP, Voerman HJ, van Dijk K. Proven  
184 Fatal Invasive Aspergillosis in a Patient with COVID-19 and Staphylococcus aureus Pneumonia. *J*  
185 *Fungi (Basel)* 2021; **7**(3).
- 186 72. Van Biesen S, Kwa D, Bosman RJ, Juffermans NP. Detection of Invasive Pulmonary  
187 Aspergillosis in COVID-19 with Non-directed Bronchoalveolar Lavage. *Am J Respir Crit Care Med*  
188 2020.
- 189 73. van Grootveld R, van Paassen J, de Boer MGJ, et al. Systematic screening for COVID-19  
190 associated invasive aspergillosis in ICU patients by culture and PCR on tracheal aspirate. *Mycoses*  
191 2021; **64**(6): 641-50.
- 192 74. van Arkel ALE, Rijpstra TA, Belderbos HNA, van Wijngaarden P, Verweij PE, Bentvelsen RG.  
193 COVID-19-associated Pulmonary Aspergillosis. *Am J Respir Crit Care Med* 2020; **202**(1): 132-5.
- 194 75. Meijer EFJ, Dofferhoff ASM, Hoiting O, Meis JF. COVID-19-associated pulmonary  
195 aspergillosis: a prospective single-center dual case series. *Mycoses* 2021; **64**(4): 457-64.
- 196 76. Yusuf E, Vonk A, van den Akker JPC, et al. Frequency of Positive Aspergillus Tests in COVID-  
197 19 Patients in Comparison to Other Patients with Pulmonary Infections Admitted to the Intensive  
198 Care Unit. *J Clin Microbiol* 2021; **59**(3).
- 199 77. Iqbal A, Ramzan M, Akhtar A, Ahtesham A, Aslam S, Khalid J. COVID-Associated Pulmonary  
200 Aspergillosis and Its Related Outcomes: A Single-Center Prospective Observational Study. *Cureus*  
201 2021; **13**(8): e16982.
- 202 78. Nasir N, Farooqi J, Mahmood SF, Jabeen K. COVID-19-associated pulmonary aspergillosis  
203 (CAPA) in patients admitted with severe COVID-19 pneumonia: An observational study from  
204 Pakistan. *Mycoses* 2020; **63**(8): 766-70.
- 205 79. Wachnicka-Truty R, Curylo B, Wojtowicz D, et al. Life-threatening COVID-19 and  
206 aspergillosis co-infection in a heart transplant recipient: A cardiologist's nightmare. *Cardiol J* 2022.
- 207 80. Ranhel D, Ribeiro A, Batista J, et al. COVID-19-Associated Invasive Pulmonary Aspergillosis in  
208 the Intensive Care Unit: A Case Series in a Portuguese Hospital. *J Fungi (Basel)* 2021; **7**(10).
- 209 81. Abdalla S, Almaslamani MA, Hashim SM, Ibrahim AS, Omrani AS. Fatal Coronavirus Disease  
210 2019-associated Pulmonary Aspergillosis; A Report of Two Cases and Review of the Literature.  
211 *IDCases* 2020; **22**: e00935.
- 212 82. Toc DA, Costache C, Botan A, et al. Mixed Etiology COVID-19 Associated Pulmonary  
213 Aspergillosis (CAPA)-A Case Report and Brief Review of the Literature. *J Fungi (Basel)* 2021; **7**(10).
- 214 83. Klimko N. CAPA in Russia, site unknown. In: Danila Seidel F, editor.; 2021.
- 215 84. Shadrivova O, Gusev D, Vashukova M, et al. COVID-19-Associated Pulmonary Aspergillosis in  
216 Russia. *J Fungi (Basel)* 2021; **7**(12).
- 217 85. Albasata H, Alamri MM, Almuhaideb SA, Aljebreen AM, Almaghrabia RS. Case Report:  
218 Diagnostic challenge of COVID-19 associated pulmonary aspergillosis (CAPA). *F1000 Research* 2021;  
219 **10**(58): 1-12.
- 220 86. Marr KA, Platt A, Tornheim JA, et al. Aspergillosis Complicating Severe Coronavirus Disease.  
221 *Emerg Infect Dis* 2021; **27**(1).
- 222 87. Garcia-Vidal C, Sanjuan G, Moreno-Garcia E, et al. Incidence of co-infections and  
223 superinfections in hospitalized patients with COVID-19: a retrospective cohort study. *Clin Microbiol*  
224 *Infect* 2021; **27**(1): 83-8.
- 225 88. Segrelles-Calvo G, Araujo GRS, Llopis-Pastor E, et al. Prevalence of opportunistic invasive  
226 aspergillosis in COVID-19 patients with severe pneumonia. *Mycoses* 2021; **64**(2): 144-51.
- 227 89. Machado M, Valerio M, Alvarez-Uria A, et al. Invasive pulmonary aspergillosis in the COVID-  
228 19 era: An expected new entity. *Mycoses* 2021; **64**(2): 132-43.

229 90. Falces-Romero I, Ruiz-Bastian M, Diaz-Pollan B, Maseda E, Garcia-Rodriguez J, Group SA-C-  
230 W. Isolation of *Aspergillus* spp. in respiratory samples of patients with COVID-19 in a Spanish  
231 Tertiary Care Hospital. *Mycoses* 2020.

232 91. Bardi T, Pintado V, Gomez-Rojo M, et al. Nosocomial infections associated to COVID-19 in  
233 the intensive care unit: clinical characteristics and outcome. *Eur J Clin Microbiol Infect Dis* 2021;  
234 **40**(3): 495-502.

235 92. Trujillo H, Fernandez-Ruiz M, Gutierrez E, et al. Invasive pulmonary aspergillosis associated  
236 with COVID-19 in a kidney transplant recipient. *Transpl Infect Dis* 2021; **23**(2): e13501.

237 93. Calderon-Parra J, Mills-Sanchez P, Moreno-Torres V, et al. COVID-19-associated pulmonary  
238 aspergillosis (CAPA): Risk factors and development of a predictive score for critically ill COVID-19  
239 patients. *Mycoses* 2022.

240 94. Garcia Clemente M, Hermida Valverde T, Leizaola-Irigoyen O, et al. [Can SARS-CoV-2 be a  
241 Risk Factor for Pulmonary Aspergillosis?]. *Arch Bronconeumol* 2021; **57**: 72-3.

242 95. Marta GC, Lorena FE, Laura MV, et al. COVID-19-Associated Pulmonary Aspergillosis in a  
243 Tertiary Hospital. *J Fungi (Basel)* 2022; **8**(2).

244 96. Martin CS, Martine EM, Pellicer RG, Ibanez RA, Gonzalez EM, Pitarch JVL. [Invasive  
245 Pulmonary Aspergillosis in Patients with Acute Respiratory Syndrome by Covid-19.]. *Rev Esp*  
246 *Anesthesiol Reanim (Engl Ed)* 2021.

247 97. Nebreda-Mayoral T, Miguel-Gomez MA, March-Rossello GA, et al. Bacterial/fungal infection  
248 in hospitalized patients with COVID-19 in a tertiary hospital in the Community of Castilla y Leon,  
249 Spain. *Enferm Infecc Microbiol Clin (Engl Ed)* 2020.

250 98. Sogaard KK, Baettig V, Osthoff M, et al. Community-acquired and hospital-acquired  
251 respiratory tract infection and bloodstream infection in patients hospitalized with COVID-19  
252 pneumonia. *J Intensive Care* 2021; **9**(1): 10.

253 99. Lamoth F, Glampedakis E, Boillat-Blanco N, Oddo M, Pagani JL. Incidence of invasive  
254 pulmonary aspergillosis among critically ill COVID-19 patients. *Clin Microbiol Infect* 2020.

255 100. Lu DE, Hung SH, Su YS, Lee WS. Analysis of Fungal and Bacterial Co-Infections in Mortality  
256 Cases among Hospitalized Patients with COVID-19 in Taipei, Taiwan. *J Fungi (Basel)* 2022; **8**(1).

257 101. Chauvet P, Mallat J, Arumadura C, et al. Risk Factors for Invasive Pulmonary Aspergillosis in  
258 Critically Ill Patients With Coronavirus Disease 2019-Induced Acute Respiratory Distress Syndrome.  
259 *Crit Care Explor* 2020; **2**(11): e0244.

260 102. Maes M, Higginson E, Pereira-Dias J, et al. Correction to: Ventilator-associated pneumonia  
261 in critically ill patients with COVID-19. *Crit Care* 2021; **25**(1): 130.

262 103. White PL, Dhillon R, Cordey A, et al. A national strategy to diagnose COVID-19 associated  
263 invasive fungal disease in the ICU. *Clin Infect Dis* 2020.

264 104. Hughes S, Troise O, Donaldson H, Mughal N, Moore LSP. Bacterial and fungal coinfection  
265 among hospitalized patients with COVID-19: a retrospective cohort study in a UK secondary-care  
266 setting. *Clin Microbiol Infect* 2020; **26**(10): 1395-9.

267 105. Borman AM, Palmer MD, Fraser M, et al. COVID-19-Associated Invasive Aspergillosis: Data  
268 from the UK National Mycology Reference Laboratory. *J Clin Microbiol* 2020; **59**(1).

269 106. Witting C, Quaggin-Smith J, Mylvaganam R, Peigh G, Angarone M, Flaherty JD. Invasive  
270 pulmonary aspergillosis after treatment with tocilizumab in a patient with COVID-19 ARDS: a case  
271 report. *Diagn Microbiol Infect Dis* 2021; **99**(4): 115272.

272 107. Permpalung N, Chiang TP, Massie AB, et al. COVID-19 Associated Pulmonary Aspergillosis in  
273 Mechanically Ventilated Patients. *Clin Infect Dis* 2021.

274 108. Wasylyshyn AI, Wasylyshyn GR, Linder KA, Miceli MH. COVID-19-Associated Pulmonary  
275 Aspergillosis at an Academic Medical Center in the Midwestern United States. *Mycopathologia*  
276 2021; **186**(4): 499-505.

277 109. Mitaka H, Perlman DC, Javaid W, Salomon N. Putative invasive pulmonary aspergillosis in  
278 critically ill patients with COVID-19: An observational study from New York City. *Mycoses* 2020;  
279 **63**(12): 1368-72.

280 110. Patti RK, Dalsania NR, Somal N, et al. Subacute Aspergillosis "Fungal Balls" Complicating  
281 COVID-19. *J Investig Med High Impact Case Rep* 2020; **8**: 2324709620966475.

282 111. Nasrullah A, Javed A, Malik K. Coronavirus Disease-Associated Pulmonary Aspergillosis: A  
283 Devastating Complication of COVID-19. *Cureus* 2021; **13**(1): e13004.

284 112. Steenwyk JL, Mead ME, de Castro PA, et al. Genomic and Phenotypic Analysis of COVID-19-  
285 Associated Pulmonary Aspergillosis Isolates of *Aspergillus fumigatus*. *Microbiol Spectr* 2021; **9**(1):  
286 e0001021.

287 113. Zurl C, Hoenigl M, Schulz E, et al. Autopsy Proven Pulmonary Mucormycosis Due to  
288 *Rhizopus microsporus* in a Critically Ill COVID-19 Patient with Underlying Hematological Malignancy.  
289 *J Fungi (Basel)* 2021; **7**(2).

290 114. Hoenigl MS, D; Carvalho, Ag; Rudramurthy, SM; Arastehfar, A; Gangneux, JP; Nasir, N;  
291 Bonifaz, A; Araiza, J; Klimko, N; Serris, A; Lagrou, K; Meis, JF; Cornely, OA; Perfect, JR; White, PL;  
292 Chakrabarti, A; and Group, EMM and ISHAM Collaborators. The Emergence of COVID-19  
293 Associated Mucormycosis: Analysis of Cases From 18 Countries. Available at SSRN:  
294 <https://ssrncom/abstract=3844587> or <http://dxdoiorg/102139/ssrn3844587> 2021.

295 115. Pauli MA, Pereira LM, Monteiro ML, de Camargo AR, Rabelo GD. Painful palatal lesion in a  
296 patient with COVID-19. *Oral Surg Oral Med Oral Pathol Oral Radiol* 2021; **131**(6): 620-5.

297 116. Bonates P, Joao GAP, Cruz KS, et al. Fatal rhino-orbito-cerebral mucormycosis infection  
298 associated with diabetic ketoacidosis post-COVID-19. *Rev Soc Bras Med Trop* 2021; **54**: e03582021.

299 117. Monte Junior ESD, Santos M, Ribeiro IB, et al. Rare and Fatal Gastrointestinal Mucormycosis  
300 (Zygomycosis) in a COVID-19 Patient: A Case Report. *Clin Endosc* 2020; **53**(6): 746-9.

301 118. Venugopal A, Marya A. Palatal mucormycosis in a patient with SARS-CoV-2 infection. *CMAJ*  
302 2021; **193**(32): E1254.

303 119. He Y, Li W, Wang Z, Chen H, Tian L, Liu D. Nosocomial infection among patients with COVID-  
304 19: A retrospective data analysis of 918 cases from a single center in Wuhan, China. *Infect Control*  
305 *Hosp Epidemiol* 2020; **41**(8): 982-3.

306 120. Crone CG, Helweg-Larsen J, Steensen M, Arendrup MC, Helleberg M. Pulmonary  
307 mucormycosis in the aftermath of critical COVID-19 in an immunocompromised patient: Mind the  
308 diagnostic gap. *J Mycol Med* 2021; **32**(1): 101228.

309 121. Alfishawy M, Elbendary A, Younes A, et al. Diabetes mellitus and Coronavirus Disease  
310 (Covid-19) Associated Mucormycosis (CAM): A wake-up call from Egypt. *Diabetes Metab Syndr*  
311 2021; **15**(5): 102195.

312 122. Saad RH, Mobarak FA. The diversity and outcome of post-covid mucormycosis: A case  
313 report. *Int J Surg Case Rep* 2021; **88**: 106522.

314 123. Roushdy T, Hamid E. A case series of post COVID-19 mucormycosis-a neurological  
315 prospective. *Egypt J Neurol Psychiatr Neurosurg* 2021; **57**(1): 100.

316 124. Fouad YA, Abdelaziz TT, Askoura A, et al. Spike in Rhino-Orbital-Cerebral Mucormycosis  
317 Cases Presenting to a Tertiary Care Center During the COVID-19 Pandemic. *Front Med (Lausanne)*  
318 2021; **8**: 645270.

319 125. El-Kholy NA, El-Fattah AMA, Khafagy YW. Invasive Fungal Sinusitis in Post COVID-19  
320 Patients: A New Clinical Entity. *Laryngoscope* 2021; **131**(12): 2652-8.

321 126. Riad A, Shabaan AA, Issa J, et al. COVID-19-Associated Mucormycosis (CAM): Case-Series  
322 and Global Analysis of Mortality Risk Factors. *J Fungi (Basel)* 2021; **7**(10).

323 127. Bellanger AP, Navellou JC, Lepiller Q, et al. Mixed mold infection with *Aspergillus fumigatus*  
324 and *Rhizopus microsporus* in a severe acute respiratory syndrome Coronavirus 2 (SARS-CoV-2)  
325 patient. *Infect Dis Now* 2021; **51**(7): 633-5.

326 128. Benhadid-Brahmi Y, Hamane S, Soyer B, et al. COVID-19-associated mixed mold infection: A  
327 case report of aspergillosis and mucormycosis and a literature review. *J Mycol Med* 2021; **32**(1):  
328 101231.

329 129. Danion F, Letscher-Bru V, Guitard J, et al. Coronavirus Disease 2019-Associated  
330 Mucormycosis in France: A Rare but Deadly Complication. *Open Forum Infect Dis* 2022; **9**(2):  
331 ofab566.

332 130. Seidel D, Simon M, Sprute R, et al. Results from a national survey on COVID-19 associated  
333 mucormycosis in Germany: 13 patients from six tertiary hospitals. *Mycoses* 2021.



334 131. Selarka L, Sharma S, Saini D, et al. Mucormycosis and COVID-19: An epidemic within a  
335 pandemic in India. *Mycoses* 2021; **64**(10): 1253-60.

336 132. Desai EJ, Pandya A, Upadhyay I, Patel T, Banerjee S, Jain V. Epidemiology, Clinical Features  
337 and Management of Rhino Orbital Mucormycosis in Post COVID 19 Patients. *Indian J Otolaryngol*  
338 *Head Neck Surg* 2021: 1-5.

339 133. Kute VB, Meshram HS, Navadiya VV, et al. Consequences of the first and second COVID-19  
340 wave on kidney transplant recipients at a large Indian transplant centre. *Nephrology (Carlton)* 2021.

341 134. Ravani SA, Agrawal GA, Leuva PA, Modi PH, Amin KD. Rise of the phoenix: Mucormycosis in  
342 COVID-19 times. *Indian J Ophthalmol* 2021; **69**(6): 1563-8.

343 135. Moorthy A, Gaikwad R, Krishna S, et al. SARS-CoV-2, Uncontrolled Diabetes and  
344 Corticosteroids-An Unholy Trinity in Invasive Fungal Infections of the Maxillofacial Region? A  
345 Retrospective, Multi-centric Analysis. *J Maxillofac Oral Surg* 2021: 1-8.

346 136. Nehara HR, Puri I, Singhal V, Iyengar S, Bishnoi BR, Sirohi P. Rhinocerebral mucormycosis in  
347 COVID-19 patient with diabetes a deadly trio: Case series from the north-western part of India.  
348 *Indian J Med Microbiol* 2021; **39**(3): 380-3.

349 137. Suresh A, Joshi A, Desai AK, et al. Covid-19-associated fungal osteomyelitis of jaws and  
350 sinuses: An experience-driven management protocol. *Med Mycol* 2022; **60**(2).

351 138. Dubey S, Mukherjee D, Sarkar P, et al. COVID-19 associated rhino-orbital-cerebral  
352 mucormycosis: An observational study from Eastern India, with special emphasis on neurological  
353 spectrum. *Diabetes Metab Syndr* 2021; **15**(5): 102267.

354 139. Saidha PK, Kapoor S, Das P, et al. Mucormycosis of Paranasal Sinuses of Odontogenic Origin  
355 Post COVID19 Infection: A Case Series. *Indian J Otolaryngol Head Neck Surg* 2021: 1-5.

356 140. Sharma S, Grover M, Bhargava S, Samdani S, Kataria T. Post coronavirus disease  
357 mucormycosis: a deadly addition to the pandemic spectrum. *J Laryngol Otol* 2021; **135**(5): 442-7.

358 141. Arjun R, Felix V, Niyas VKM, et al. COVID-19 associated Rhino-orbital Mucormycosis: a  
359 Single Centre Experience of Ten Cases. *QJM* 2021.

360 142. Now T. Maharashtra facing shortage of mucormycosis medicine, 1,500 cases reported so  
361 far: Health Minister Rajesh Tope. May 20, 2021 2021.  
362 [https://www.timesnownews.com/india/maharashtra-news/article/maharashtra-facing-shortage-](https://www.timesnownews.com/india/maharashtra-news/article/maharashtra-facing-shortage-of-mucormycosis-medicine-1500-cases-reported-so-far-health-minister-rajesh-tope/759217)  
363 [of-mucormycosis-medicine-1500-cases-reported-so-far-health-minister-rajesh-tope/759217](https://www.timesnownews.com/india/maharashtra-news/article/maharashtra-facing-shortage-of-mucormycosis-medicine-1500-cases-reported-so-far-health-minister-rajesh-tope/759217)  
364 (accessed 16.11.2021 2021).

365 143. Dave TV, Gopinathan Nair A, Hegde R, et al. Clinical Presentations, Management and  
366 Outcomes of Rhino-Orbital-Cerebral Mucormycosis (ROCM) Following COVID-19: A Multi-Centric  
367 Study. *Ophthalmic Plast Reconstr Surg* 2021; **37**(5): 488-95.

368 144. Sen M, Honavar SG, Bansal R, et al. Epidemiology, clinical profile, management, and  
369 outcome of COVID-19-associated rhino-orbital-cerebral mucormycosis in 2826 patients in India -  
370 Collaborative OPAI-IJO Study on Mucormycosis in COVID-19 (COSMIC), Report 1. *Indian J*  
371 *Ophthalmol* 2021; **69**(7): 1670-92.

372 145. Raut A, Huy NT. Rising incidence of mucormycosis in patients with COVID-19: another  
373 challenge for India amidst the second wave? *The Lancet Respiratory Medicine* 2021.

374 146. Sen M, Lahane S, Lahane TP, Parekh R, Honavar SG. Mucor in a Viral Land: A Tale of Two  
375 Pathogens. *Indian J Ophthalmol* 2021; **69**(2): 244-52.

376 147. Patel A, Agarwal R, Rudramurthy SM, et al. Multicenter Epidemiologic Study of Coronavirus  
377 Disease-Associated Mucormycosis, India. *Emerg Infect Dis* 2021; **27**(9): 2349-59.

378 148. Gupta R, Kesavadev J, Krishnan G, et al. COVID-19 associated mucormycosis: A Descriptive  
379 Multisite Study from India. *Diabetes Metab Syndr* 2021; **15**(6): 102322.

380 149. Ramaswami A, Sahu AK, Kumar A, et al. COVID-19-associated mucormycosis presenting to  
381 the Emergency Department-an observational study of 70 patients. *QJM* 2021; **114**(7): 464-70.

382 150. Arora R, Goel R, Khanam S, et al. Rhino-Orbital-Cerebral-Mucormycosis During the COVID-19  
383 Second Wave in 2021 - A Preliminary Report from a Single Hospital. *Clin Ophthalmol* 2021; **15**:  
384 3505-14.

385 151. Singh Y, Ganesh V, Kumar S, et al. Coronavirus Disease-Associated Mucormycosis from a  
386 Tertiary Care Hospital in India: A Case Series. *Cureus* 2021; **13**(7): e16152.

387 152. Sarkar S, Gokhale T, Choudhury SS, Deb AK. COVID-19 and orbital mucormycosis. *Indian J*  
388 *Ophthalmol* 2021; **69**(4): 1002-4.

389 153. Joshi S, Telang R, Tambe M, et al. Outbreak of Mucormycosis in Coronavirus Disease  
390 Patients, Pune, India. *Emerg Infect Dis* 2021; **28**(1).

391 154. Mishra Y, Prashar M, Sharma D, Akash, Kumar VP, Tilak T. Diabetes, COVID 19 and  
392 mucormycosis: Clinical spectrum and outcome in a tertiary care medical center in Western India.  
393 *Diabetes Metab Syndr* 2021; **15**(4): 102196.

394 155. Mehta R, Nagarkar NM, Jindal A, et al. Multidisciplinary Management of COVID-Associated  
395 Mucormycosis Syndemic in India. *Indian J Surg* 2021: 1-9.

396 156. Pippal SK, Kumar D, Ukawat L. Management Challenge of Rhino-Orbito-Cerebral  
397 Mucormycosis in Covid 19 Era: A Prospective Observational Study. *Indian J Otolaryngol Head Neck*  
398 *Surg* 2021: 1-7.

399 157. Nelwan EJ, Tunjungputri RN, Wardani RS, Wahyuningsih R. Black Fungus Complicated with  
400 COVID-19 in a Man with Underlying Non-Hodgkin's Lymphoma. *Acta Med Indones* 2021; **53**(3): 349-  
401 51.

402 158. Avatef Fazeli M, Rezaei L, Javadirad E, et al. Increased incidence of rhino-orbital  
403 mucormycosis in an educational therapeutic hospital during the COVID-19 pandemic in western  
404 Iran: An observational study. *Mycoses* 2021; **64**(11): 1366-77.

405 159. Pakdel F, Ahmadikia K, Salehi M, et al. Mucormycosis in patients with COVID-19: A cross-  
406 sectional descriptive multicentre study from Iran. *Mycoses* 2021; **64**(10): 1238-52.

407 160. Karimi-Galougahi M, Arastou S, Haseli S. Fulminant mucormycosis complicating coronavirus  
408 disease 2019 (COVID-19). *Int Forum Allergy Rhinol* 2021; **11**(6): 1029-30.

409 161. Tabarsi P, Khalili N, Pourabdollah M, et al. Case Report: Coronavirus Disease 2019-  
410 associated Rhinosinusitis Mucormycosis Caused by Rhizopus arrhizus: A Rare but Potentially Fatal  
411 Infection Occurring After Treatment with Corticosteroids. *Am J Trop Med Hyg* 2021.

412 162. Veisi A, Bagheri A, Eshaghi M, Rikhtehgar MH, Rezaei Kanavi M, Farjad R. Rhino-orbital  
413 mucormycosis during steroid therapy in COVID-19 patients: A case report. *Eur J Ophthalmol* 2021:  
414 11206721211009450.

415 163. Mohammadi F, Badri M, Safari S, Hemmat N. A case report of rhino-facial mucormycosis in  
416 a non-diabetic patient with COVID-19: a systematic review of literature and current update. *BMC*  
417 *Infect Dis* 2021; **21**(1): 906.

418 164. Ostovan VR, Rezapannah S, Behzadi Z, et al. Coronavirus disease (COVID-19) complicated by  
419 rhino-orbital-cerebral mucormycosis presenting with neurovascular thrombosis: a case report and  
420 review of literature. *J Neurovirol* 2021; **27**(4): 644-9.

421 165. Pasero D, Sanna S, Liperi C, et al. A challenging complication following SARS-CoV-2  
422 infection: a case of pulmonary mucormycosis. *Infection* 2021; **49**(5): 1055-60.

423 166. Waizel-Haiat S, Guerrero-Paz JA, Sanchez-Hurtado L, Calleja-Alarcon S, Romero-Gutierrez L.  
424 A Case of Fatal Rhino-Orbital Mucormycosis Associated With New Onset Diabetic Ketoacidosis and  
425 COVID-19. *Cureus* 2021; **13**(2): e13163.

426 167. Guzman-Castro S, Chora-Hernandez LD, Trujillo-Alonso G, et al. COVID-19-associated  
427 mucormycosis, diabetes and steroid therapy: Experience in a single centre in Western Mexico.  
428 *Mycoses* 2021.

429 168. Shrestha O, Sharma Baral R. Covid-19 associated Mucormycosis: A case report. *J Nepal*  
430 *Health Res Counc* 2021; **19**(2): 414-6.

431 169. Kumar Gupta S, Jyotsana P, Singh A, Phuyal D, Allam P. Rhinocerebral Mucormycosis in a  
432 COVID-19 Patient from Nepal: A Case Report. *JNMA J Nepal Med Assoc* 2021; **59**(239): 703-5.

433 170. Buil JB, van Zanten ARH, Bentvelsen RG, et al. Case series of four secondary mucormycosis  
434 infections in COVID-19 patients, the Netherlands, December 2020 to May 2021. *Euro Surveill* 2021;  
435 **26**(23).

436 171. Mobeen H, Khan NU, Hassan M, et al. Orbital mucormycosis -post SARS-CoV-2 sequelae.  
437 *Brain Hemorrhages* 2021.

- 438 172. Nasir N, Farooqi J, Mahmood SF, Jabeen K. COVID-19 associated mucormycosis: a life-  
439 threatening complication in patients admitted with severe to critical COVID-19 from Pakistan. *Clin*  
440 *Microbiol Infect* 2021; **27**(11): 1704-7.
- 441 173. Alamin MA, Abdulgayoom M, Niraula S, Abdelmahmuod E, Ahmed AO, Danjuma MI. Rhino-  
442 orbital Mucormycosis as a complication of severe COVID-19 pneumonia. *IDCases* 2021; **26**: e01293.
- 443 174. Arana C, Cuevas Ramirez RE, Xipell M, et al. Mucormycosis associated with COVID-19 in two  
444 kidney transplant patients. *Transpl Infect Dis* 2021; **23**(4): e13652.
- 445 175. Lai CC, Wu CJ, Lee YC, Liu WL. COVID-19 associated with concomitant mucormycosis and  
446 aspergillosis. *J Microbiol Immunol Infect* 2021.
- 447 176. Malek I, Sayadi J, Lahiani R, et al. Acute bilateral blindness in a young Covid-19 patient with  
448 rhino-orbito-cerebral mucormycosis. *J Ophthalmic Inflamm Infect* 2021; **11**(1): 40.
- 449 177. Demirogu YZ, Odemis I, Oruc E, et al. [Two Case of Rhino-Orbito-Cerebral Mucormycosis  
450 Developed After COVID-19 Infection]. *Mikrobiyol Bul* 2021; **55**(4): 673-82.
- 451 178. Bayram N, Ozsaygili C, Sav H, et al. Susceptibility of severe COVID-19 patients to rhino-  
452 orbital mucormycosis fungal infection in different clinical manifestations. *Jpn J Ophthalmol* 2021;  
453 **65**(4): 515-25.
- 454 179. Sargin FA, M; Karaduman, S; Sungurtekin, H. Severe Rhinocerebral Mucormycosis Case  
455 Developed After COVID 19. *J Bacteriol Parasitol* 2021; **12**: 386.
- 456 180. Dilek A, Ozaras R, Ozkaya S, Sunbul M, Sen EI, Leblebicioglu H. COVID-19-associated  
457 mucormycosis: Case report and systematic review. *Travel Med Infect Dis* 2021; **44**: 102148.
- 458 181. Hanley B, Naresh KN, Roufosse C, et al. Histopathological findings and viral tropism in UK  
459 patients with severe fatal COVID-19: a post-mortem study. *Lancet Microbe* 2020; **1**(6): e245-e53.
- 460 182. Krishna V, Morjaria J, Jalandari R, Omar F, Kaul S. Autoptic identification of disseminated  
461 mucormycosis in a young male presenting with cerebrovascular event, multi-organ dysfunction and  
462 COVID-19 infection. *IDCases* 2021; **25**: e01172.
- 463 183. Placik DA, Taylor WL, Wnuk NM. Bronchopleural fistula development in the setting of novel  
464 therapies for acute respiratory distress syndrome in SARS-CoV-2 pneumonia. *Radiol Case Rep* 2020;  
465 **15**(11): 2378-81.
- 466 184. Johnson AK, Ghazarian Z, Cendrowski KD, Persichino JG. Pulmonary aspergillosis and  
467 mucormycosis in a patient with COVID-19. *Med Mycol Case Rep* 2021; **32**: 64-7.
- 468 185. Dallalzadeh LO, Ozzello DJ, Liu CY, Kikkawa DO, Korn BS. Secondary infection with rhino-  
469 orbital cerebral mucormycosis associated with COVID-19. *Orbit* 2021: 1-4.
- 470 186. Mekonnen ZK, Ashraf DC, Jankowski T, et al. Acute Invasive Rhino-Orbital Mucormycosis in  
471 a Patient With COVID-19-Associated Acute Respiratory Distress Syndrome. *Ophthalmic Plast*  
472 *Reconstr Surg* 2021; **37**(2): e40-e80.
- 473 187. Kanwar A, Jordan A, Olewiler S, Wehberg K, Cortes M, Jackson BR. A Fatal Case of Rhizopus  
474 azygosporus Pneumonia Following COVID-19. *J Fungi (Basel)* 2021; **7**(3).
- 475 188. Alekseyev K, Didenko L, Chaudhry B. Rhinocerebral Mucormycosis and COVID-19  
476 Pneumonia. *J Med Cases* 2021; **12**(3): 85-9.
- 477 189. Werthman-Ehrenreich A. Mucormycosis with orbital compartment syndrome in a patient  
478 with COVID-19. *Am J Emerg Med* 2021; **42**: 264 e5- e8.
- 479 190. Khatri A, Chang KM, Berlinrut I, Wallach F. Mucormycosis after Coronavirus disease 2019  
480 infection in a heart transplant recipient - Case report and review of literature. *J Mycol Med* 2021;  
481 **31**(2): 101125.
- 482 191. Elhamamsy S, Bayer T, Al-Kaffas M, et al. Rhino-Orbital Cerebral Mucormycosis in Non-  
483 Diabetic Patients with COVID-19. *R I Med J (2013)* 2021; **104**(8): 19-21.
- 484 192. Khan N, Gutierrez CG, Martinez DV, Proud KC. A case report of COVID-19 associated  
485 pulmonary mucormycosis. *Arch Clin Cases* 2020; **7**(3): 46-51.
- 486 193. Souquett Gil M. Micólogos registran 4 casos de mucormycosis asociada al COVID-19 en  
487 Venezuela. 2021. [https://efectococuyo.com/salud/hongo-negro-venezuela-mucormycosis-asociada-](https://efectococuyo.com/salud/hongo-negro-venezuela-mucormycosis-asociada-al-covid-19/)  
488 [al-covid-19/](https://efectococuyo.com/salud/hongo-negro-venezuela-mucormycosis-asociada-al-covid-19/) (accessed 16.11.2021 2021).
- 489 194. Benedetti MF, de Abreu MS, Cadena RC, et al. Invasive pulmonary aspergillosis and  
490 candidiasis in a critically ill patient with COVID-19. *J Mycol Med* 2022; **32**(2): 101251.

491 195. Seitz T, Hoepfer W, Weseslindtner L, et al. Successful management of the first reported case  
492 in Austria of COVID-19 with ARDS. *Infection* 2020; **48**(4): 647-51.

493 196. Saeed NK, Al-Khawaja S, Alsalman J, Almusawi S, Albalooshi NA, Al-Biltagi M. Bacterial co-  
494 infection in patients with SARS-CoV-2 in the Kingdom of Bahrain. *World J Virol* 2021; **10**(4): 168-81.

495 197. de Almeida JNJ, Brandao IB, Francisco EC, et al. Axillary Digital Thermometers uplifted a  
496 multidrug-susceptible *Candida auris* outbreak among COVID-19 patients in Brazil. *Mycoses* 2021;  
497 **64**(9): 1062-72.

498 198. de Almeida JN, Jr., Francisco EC, Hagen F, et al. Emergence of *Candida auris* in Brazil in a  
499 COVID-19 Intensive Care Unit. *J Fungi (Basel)* 2021; **7**(3).

500 199. Silva DL, Lima CM, Magalhaes VCR, et al. Fungal and bacterial coinfections increase  
501 mortality of severely ill COVID-19 patients. *J Hosp Infect* 2021; **113**: 145-54.

502 200. Riche CVW, Cassol R, Pasqualotto AC. Is the Frequency of Candidemia Increasing in COVID-  
503 19 Patients Receiving Corticosteroids? *J Fungi (Basel)* 2020; **6**(4).

504 201. Nucci M, Barreiros G, Guimaraes LF, Deriquehem VAS, Castineiras AC, Nouer SA. Increased  
505 incidence of candidemia in a tertiary care hospital with the COVID-19 pandemic. *Mycoses* 2021;  
506 **64**(2): 152-6.

507 202. Zhang J, Lan P, Yi J, et al. Secondary bloodstream infection in critically ill patients with  
508 COVID-19. *J Int Med Res* 2021; **49**(12): 3000605211062783.

509 203. Sang L, Xi Y, Lin Z, et al. Secondary infection in severe and critical COVID-19 patients in  
510 China: a multicenter retrospective study. *Ann Palliat Med* 2021; **10**(8): 8557-70.

511 204. Rodriguez JY, Le Pape P, Lopez O, Esquea K, Labiosa AL, Alvarez-Moreno C. *Candida auris*: A  
512 Latent Threat to Critically Ill Patients With Coronavirus Disease 2019. *Clin Infect Dis* 2021; **73**(9):  
513 e2836-e7.

514 205. Flores B. Paciente infectado por *Candida Auris* falleció y estuvo ingresado en Hospital El  
515 Salvador, asegura médico Iván Solano. 2021.  
516 [https://www.laprensagrafica.com/elsalvador/Advierten-primer-caso-por-infeccion-de-hongo-](https://www.laprensagrafica.com/elsalvador/Advierten-primer-caso-por-infeccion-de-hongo-Candida-Auris-en-El-Salvador-20210222-0047.html)  
517 [Candida-Auris-en-El-Salvador-20210222-0047.html](https://www.laprensagrafica.com/elsalvador/Advierten-primer-caso-por-infeccion-de-hongo-Candida-Auris-en-El-Salvador-20210222-0047.html) (accessed 30.09.2021 2021).

518 206. Ramadan HK, Mahmoud MA, Aburahma MZ, et al. Predictors of Severity and Co-Infection  
519 Resistance Profile in COVID-19 Patients: First Report from Upper Egypt. *Infect Drug Resist* 2020; **13**:  
520 3409-22.

521 207. Bretagne S, Sitbon K, Botterel F, et al. COVID-19-Associated Pulmonary Aspergillosis,  
522 Fungemia, and Pneumocystosis in the Intensive Care Unit: a Retrospective Multicenter  
523 Observational Cohort during the First French Pandemic Wave. *Microbiol Spectr* 2021; **9**(2):  
524 e0113821.

525 208. Buetti N, Ruckly S, de Montmollin E, et al. COVID-19 increased the risk of ICU-acquired  
526 bloodstream infections: a case-cohort study from the multicentric OUTCOMEREA network.  
527 *Intensive Care Med* 2021; **47**(2): 180-7.

528 209. Wiese-Posselt M, Hinrichs C, Weikert B, et al. Infection control in two COVID-19 patients  
529 with evidence for *Candida Auris*, Germany. 6th international conference on prevention & infection  
530 control (ICPIC 2021). Switzerland: Antimicrobial Resistance and Infection Control; 2021. p. 130.

531 210. Spiliopoulou A, Kolonitsiou F, Vrioni G, Tsoupra S, Lekkou A, Paliogianni F. Invasive *Candida*  
532 *kefyri* infection presenting as pyelonephritis in an ICU hospitalized COVID-19 patient: Case report  
533 and review of the literature. *J Mycol Med* 2021; **32**(2): 101236.

534 211. PAHO. *Candida auris* outbreaks in health care services in the context of the COVID-19  
535 pandemic. [www.iris.paho.org](http://www.iris.paho.org), 2021.

536 212. Szabo BG, Lakatos B, Bobek I, Szabo E, Szlavik J, Valyi-Nagy I. Invasive fungal infections  
537 among critically ill adult COVID-19 patients: First experiences from the national centre in Hungary. *J*  
538 *Mycol Med* 2021; **31**(4): 101198.

539 213. Chowdhary A, Tarai B, Singh A, Sharma A. Multidrug-Resistant *Candida auris* Infections in  
540 Critically Ill Coronavirus Disease Patients, India, April-July 2020. *Emerg Infect Dis* 2020; **26**(11):  
541 2694-6.

542 214. Rajni E, Singh A, Tarai B, et al. A High Frequency of Candida auris Blood Stream Infections in  
543 Coronavirus Disease 2019 Patients Admitted to Intensive Care Units, Northwestern India: A Case  
544 Control Study. *Open Forum Infect Dis* 2021; **8**(12): ofab452.

545 215. Agarwal M, Sachdeva M, Pal S, Shah H, Kumar RM, Banker A. Endogenous Endophthalmitis  
546 A Complication of COVID-19 Pandemic: A Case Series. *Ocul Immunol Inflamm* 2021; **29**(4): 726-9.

547 216. Niyas VK, Rahulan SD, Arjun R, Sasidharan A. ICU-acquired Candidemia in COVID-19  
548 Patients: An Experience from a Tertiary Care Hospital in Kerala, South India. *Indian J Crit Care Med*  
549 2021; **25**(10): 1207-8.

550 217. Shroff D, Narula R, Atri N, et al. Endogenous fungal endophthalmitis following intensive  
551 corticosteroid therapy in severe COVID-19 disease. *Indian J Ophthalmol* 2021; **69**(7): 1909-14.

552 218. Bhagali R, Prabhudesai NP, Prabhudesai MN. Post COVID-19 opportunistic candida retinitis:  
553 A case report. *Indian J Ophthalmol* 2021; **69**(4): 987-9.

554 219. Goyal M, Murthy SI, Annum S. Retinal manifestations in patients following COVID-19  
555 infection: A consecutive case series. *Indian J Ophthalmol* 2021; **69**(5): 1275-82.

556 220. Sari AP, Darnindro N, Yohanes A, Mokoagow MI. Role of tocilizumab for concomitant  
557 systemic fungal infection in severe COVID-19 patient: Case report. *Medicine (Baltimore)* 2021;  
558 **100**(12): e25173.

559 221. Arastehfar A, Shaban T, Zarrinfar H, et al. Candidemia among Iranian Patients with Severe  
560 COVID-19 Admitted to ICUs. *J Fungi (Basel)* 2021; **7**(4).

561 222. Davoodi L, Faeli L, Mirzakhani R, Jalalian R, Shokohi T, Kermani F. Catastrophic Candida  
562 prosthetic valve endocarditis and COVID-19 comorbidity: A rare case. *Curr Med Mycol* 2021; **7**(2):  
563 43-7.

564 223. Hebert J, Barr E, Magee C. Pacemaker-related Candida parapsilosis fungaemia in an  
565 immunosuppressed renal transplant recipient. *BMJ Case Rep* 2021; **14**(7).

566 224. Brikman S, Dori G, Kasher C, et al. Candida Bloodstream Infection, a Dire Complication in  
567 Hospitalized COVID-19 Patients: Three Cases from a Single Center in Northern Israel. *Isr Med Assoc J*  
568 2021; **23**(10): 615-7.

569 225. Ayalon O, Cohen MJ, Orenbuch-Harroch E, Svirj S, van Heerden PV, Korem M. Invasive  
570 fungal infections in critically ill COVID-19 patients in a large tertiary university hospital in Israel. *J*  
571 *Crit Care* 2022; **69**: 154004.

572 226. Magnasco L, Mikulska M, Giacobbe DR, et al. Spread of Carbapenem-Resistant Gram-  
573 Negatives and Candida auris during the COVID-19 Pandemic in Critically Ill Patients: One Step Back  
574 in Antimicrobial Stewardship? *Microorganisms* 2021; **9**(1).

575 227. Di Pilato V, Codda G, Ball L, et al. Molecular Epidemiological Investigation of a Nosocomial  
576 Cluster of C. auris: Evidence of Recent Emergence in Italy and Ease of Transmission during the  
577 COVID-19 Pandemic. *J Fungi (Basel)* 2021; **7**(2).

578 228. Hanson BM, Dinh AQ, Tran TT, et al. Candida auris Invasive Infections during a COVID-19  
579 Case Surge. *Antimicrob Agents Chemother* 2021; **65**(10): e0114621.

580 229. Cultrera R, Barozzi A, Libanore M, et al. Co-Infections in Critically Ill Patients with or without  
581 COVID-19: A Comparison of Clinical Microbial Culture Findings. *Int J Environ Res Public Health* 2021;  
582 **18**(8).

583 230. Antinori S, Bonazzetti C, Gubertini G, et al. Tocilizumab for cytokine storm syndrome in  
584 COVID-19 pneumonia: an increased risk for candidemia? *Autoimmun Rev* 2020; **19**(7): 102564.

585 231. Mastrangelo A, Germinario BN, Ferrante M, et al. Candidemia in Coronavirus Disease 2019  
586 (COVID-19) Patients: Incidence and Characteristics in a Prospective Cohort Compared With  
587 Historical Non-COVID-19 Controls. *Clin Infect Dis* 2021; **73**(9): e2838-e9.

588 232. Posteraro B, De Angelis G, Menchinelli G, et al. Risk Factors for Mortality in Adult COVID-19  
589 Patients Who Develop Bloodstream Infections Mostly Caused by Antimicrobial-Resistant  
590 Organisms: Analysis at a Large Teaching Hospital in Italy. *J Clin Med* 2021; **10**(8).

591 233. Giacobbe DR, Battaglini D, Ball L, et al. Bloodstream infections in critically ill patients with  
592 COVID-19. *Eur J Clin Invest* 2020; **50**(10): e13319.

593 234. Yamamoto K, Nakamura K, Hagiya H, Otsuka F. Candidemia in COVID-19 treated with  
594 corticosteroids and tocilizumab. *Clin Case Rep* 2021; **9**(9): e04858.

595 235. Baba H, Kanamori H, Seike I, et al. Multiple Secondary Healthcare-Associated Infections Due  
596 to Carbapenem-Resistant Organisms in a Critically Ill COVID-19 Patient on Extensively Prolonged  
597 Venovenous Extracorporeal Membrane Oxygenation Support-A Case Report. *Microorganisms* 2021;  
598 **10**(1).

599 236. Allaw F, Kara Zahreddine N, Ibrahim A, et al. First Candida auris Outbreak during a COVID-19  
600 Pandemic in a Tertiary-Care Center in Lebanon. *Pathogens* 2021; **10**(2).

601 237. Awada B, Alam W, Chalfoun M, Araj G, Bizri AR. COVID-19 and Candida duobushaemulonii  
602 superinfection: A case report. *J Mycol Med* 2021; **31**(3): 101168.

603 238. Villanueva-Lozano H, Treviño-Rangel RJ, González GM, et al. Outbreak of Candida auris  
604 infection in a COVID-19 hospital in Mexico. *Clin Microbiol Infect* 2021; **27**(5): 813-6.

605 239. Al-Hatmi AMS, Mohsin J, Al-Huraizi A, Khamis F. COVID-19 associated invasive candidiasis. *J*  
606 *Infect* 2021; **82**(2): e45-e6.

607 240. Moin S, Farooqi J, Rattani S, Nasir N, Zaka S, Jabeen K. C. auris and non-C. auris candidemia  
608 in hospitalized adult and pediatric COVID-19 patients; single center data from Pakistan. *Med Mycol*  
609 2021.

610 241. Moin S, Farooqi J, Rattani S, Nasir N, Zaka S, Jabeen K. C. auris and non-C. auris candidemia  
611 in hospitalized adult and pediatric COVID-19 patients; single center data from Pakistan. *Med Mycol*  
612 2021; **59**(12): 1238-42.

613 242. Miranda MA, Sousa SC, Montes VL. Post-COVID-19 neurocandidiasis. *Neurol Sci* 2021;  
614 **42**(11): 4419-20.

615 243. Omrani AS, Koleri J, Ben Abid F, et al. Clinical characteristics and risk factors for COVID-19-  
616 associated Candidemia. *Med Mycol* 2021; **59**(12): 1262-6.

617 244. Goravey W, Ali GA, Ali M, Ibrahim EB, Al Maslamani M, Abdel Hadi H. Ominous  
618 combination: COVID-19 disease and Candida auris fungemia-Case report and review of the  
619 literature. *Clin Case Rep* 2021; **9**(9): e04827.

620 245. Klimko N, Kozlova, O. In: D. S, editor.; 2022.

621 246. Al Argan RJ, Alqatari SG, Al Said AH, et al. Gastrointestinal perforation secondary to COVID-  
622 19: Case reports and literature review. *Medicine (Baltimore)* 2021; **100**(19): e25771.

623 247. Alfonso-Sanchez JL, Agurto-Ramirez A, Chong-Valbuena MA, et al. The Influence of Infection  
624 and Colonization on Outcomes in Inpatients With COVID-19: Are We Forgetting Something? *Front*  
625 *Public Health* 2021; **9**: 747791.

626 248. Mulet Bayona JV, Tormo Palop N, Salvador García C, et al. Impact of the SARS-CoV-2  
627 Pandemic in Candidaemia, Invasive Aspergillosis and Antifungal Consumption in a Tertiary Hospital.  
628 *J Fungi (Basel)* 2021; **7**(6).

629 249. Segrelles-Calvo G, de SAGR, Llopis-Pastor E, et al. Candida spp. co-infection in COVID-19  
630 patients with severe pneumonia: Prevalence study and associated risk factors. *Respir Med* 2021;  
631 **188**: 106619.

632 250. Gorospe-Sarasua L, Gallego-Rivera JI, Munoz-Molina GM, et al. [Delayed Candida  
633 Costochondritis and Spondylitis in a Post-COVID-19 Patient Previously Treated With Corticosteroids,  
634 Antibiotics, and Tocilizumab]. *Arch Bronconeumol* 2021; **57**: 48-50.

635 251. Moreno-Gomez LM, Esteban-Sinovas O, Garcia-Perez D, Garcia-Posadas G, Delgado-  
636 Fernandez J, Paredes I. Case Report: SARS-CoV-2 Infection-Are We Redeemed? A Report of Candida  
637 Spondylodiscitis as a Late Complication. *Front Med (Lausanne)* 2021; **8**: 751101.

638 252. Kaluarachchi S, Abeykoon M. A case of endogenous candida endophthalmitis with  
639 incidental cytomegalovirus infection and optic neuropathy in a patient recovered from severe  
640 COVID-19. *Indian J Ophthalmol* 2022; **70**(1): 323-6.

641 253. Komec S, Karabicak N, Ceylan AN, Gulmez A, Ozalp O. [Three Candida auris Case Reports  
642 from Istanbul, Turkey]. *Mikrobiyol Bul* 2021; **55**(3): 452-60.

643 254. Bolukbasi Y, Erkose Genc G, Orhun G, et al. [First Case of COVID-19 Positive Candida auris  
644 Fungemia in Turkey]. *Mikrobiyol Bul* 2021; **55**(4): 648-55.

645 255. Kayaaslan B, Eser F, Kaya Kalem A, et al. Characteristics of candidemia in COVID-19 patients;  
646 increased incidence, earlier occurrence and higher mortality rates compared to non-COVID-19  
647 patients. *Mycoses* 2021; **64**(9): 1083-91.



- 648 256. Coskun AS, Durmaz SO. Fungal Infections in COVID-19 Intensive Care Patients. *Po J*  
649 *Microbiol* 2021; **70**(3): 395-400.
- 650 257. Gorkem A, Sav H, Kaan O, Eren E. Coronavirus disease and candidemia infection: A case  
651 report. *J Mycol Med* 2021; **31**(3): 101155.
- 652 258. Senok A, Alfaresi M, Khansaheb H, et al. Coinfections in Patients Hospitalized with COVID-  
653 19: A Descriptive Study from the United Arab Emirates. *Infect Drug Resist* 2021; **14**: 2289-96.
- 654 259. White PL, Dhillon R, Healy B, Wise MP, Backs M. Reply to Rodriguez et al and Mastrangelo  
655 et al. *Clin Infect Dis* 2021; **73**(9): e2839-e41.
- 656 260. Clough N, Pringle E, Minakaran N, Schelenz S. Care for critically ill patients with COVID-19:  
657 don't forget the eyes. *Eye (Lond)* 2021; **35**(4): 1054-5.
- 658 261. Diamond F. Battling C. Auris and COVID-19 at Same Time. 2021.  
659 <https://www.infectioncontrolday.com/view/battling-c-auris-and-covid-19-at-same-time>  
660 (accessed 16.11.2021 2021).
- 661 262. Prestel C, Anderson E, Forsberg K, et al. Candida auris Outbreak in a COVID-19 Specialty  
662 Care Unit - Florida, July-August 2020. *MMWR Morb Mortal Wkly Rep* 2021; **70**(2): 56-7.
- 663 263. Kordalewska M, Guerrero KD, Garcia-Rubio R, et al. Antifungal Drug Susceptibility and  
664 Genetic Characterization of Fungi Recovered from COVID-19 Patients. *J Fungi (Basel)* 2021; **7**(7).
- 665 264. Bishburg E, Okoh A, Nagarakanti SR, Lindner M, Migliore C, Patel P. Fungemia in COVID-19  
666 ICU patients, a single medical center experience. *J Med Virol* 2021; **93**(5): 2810-4.
- 667 265. Mirchin R, Czeresnia JM, Orner EP, Chaturvedi S, Murphy K, Nosanchuk JD. The Continuing  
668 Emergence of *Candida blankii* as a Pathogenic Fungus: A New Case of Fungemia in a Patient  
669 Infected with SARS-CoV-2. *J Fungi (Basel)* 2022; **8**(2).
- 670 266. Nori P, Cowman K, Chen V, et al. Bacterial and fungal coinfections in COVID-19 patients  
671 hospitalized during the New York City pandemic surge. *Infect Control Hosp Epidemiol* 2021; **42**(1):  
672 84-8.
- 673 267. Sturm LK, Saake K, Roberts PB, Masoudi FA, Fakhri MG. Impact of COVID-19 pandemic on  
674 hospital onset bloodstream infections (HOBSI) at a large health system. *Am J Infect Control* 2022;  
675 **50**(3): 245-9.
- 676 268. Alataby H, Atemnkeng F, Bains SS, Kenne FM, Diaz K, Nfonoyim J. A COVID-19 Case  
677 Complicated by *Candida dubliniensis* and *Klebsiella pneumoniae*-Carbapenem-Resistant  
678 Enterobacteriaceae. *J Med Cases* 2020; **11**(12): 403-6.
- 679 269. Macauley P, Epelbaum O. Epidemiology and Mycology of Candidaemia in non-oncological  
680 medical intensive care unit patients in a tertiary center in the United States: Overall analysis and  
681 comparison between non-COVID-19 and COVID-19 cases. *Mycoses* 2021; **64**(6): 634-40.
- 682 270. Seagle EE, Jackson BR, Lockhart SR, et al. The Landscape of Candidemia During the  
683 Coronavirus Disease 2019 (COVID-19) Pandemic. *Clin Infect Dis* 2022; **74**(5): 802-11.

684

685

686

687

688

689

690

691

692

693

694

695

696

697

698

699
