# Supplementary material
Source: PubMed Central journal article supplement (PMC9362108)
Supplement: 41564_2022_1172_MOESM2_ESM.pdf [file 41564_2022_1172_MOESM2_ESM.pdf]

1 **Supplemental Table 2:** Characteristics and risk factors of COVID-associated pulmonary aspergillosis (CAPA), COVID-associated mucormycosis  
 2 (CAM), and COVID-associated candidiasis (CAC).

3  = particularly relevant for low- and middle-income countries (LMICs)

4  = relevant also for *C. auris*

|                     | CAPA                                                                                                                                                                                                                                                                                                                                                                                                                                                                              | CAM                                                                                                                                                                                                                                                                                                                                                                                                                                                                            | CAC                                                                                                                                                                                                                                                                                                                                                                                                                                                                                    |
|---------------------|-----------------------------------------------------------------------------------------------------------------------------------------------------------------------------------------------------------------------------------------------------------------------------------------------------------------------------------------------------------------------------------------------------------------------------------------------------------------------------------|--------------------------------------------------------------------------------------------------------------------------------------------------------------------------------------------------------------------------------------------------------------------------------------------------------------------------------------------------------------------------------------------------------------------------------------------------------------------------------|----------------------------------------------------------------------------------------------------------------------------------------------------------------------------------------------------------------------------------------------------------------------------------------------------------------------------------------------------------------------------------------------------------------------------------------------------------------------------------------|
| Prevalence          | Prevalence about 10% among invasive ventilated COVID-19 patients <sup>1-3</sup>                                                                                                                                                                                                                                                                                                                                                                                                   | Prevalence of 0.27% among hospitalized COVID-19 patients in India <sup>4</sup>                                                                                                                                                                                                                                                                                                                                                                                                 | Unknown, outbreaks reported from 12 countries in the Americas, Europe and Middle East                                                                                                                                                                                                                                                                                                                                                                                                  |
| Infectious agents   | <i>A. fumigatus</i> predominant<br>! Azole resistant <i>A. fumigatus</i>                                                                                                                                                                                                                                                                                                                                                                                                          | <i>Rhizopus</i> spp. predominant <sup>4</sup>                                                                                                                                                                                                                                                                                                                                                                                                                                  | <i>C. albicans</i> predominant<br>! <i>C. auris</i>                                                                                                                                                                                                                                                                                                                                                                                                                                    |
| Shared risk factors | Male sex <sup>4-9</sup><br>Older age <sup>1,4,10-14</sup><br>Systemic corticosteroids<br>Severe COVID-19, ARDS<br>ICU treatment                                                                                                                                                                                                                                                                                                                                                   |                                                                                                                                                                                                                                                                                                                                                                                                                                                                                |                                                                                                                                                                                                                                                                                                                                                                                                                                                                                        |
| Risk factors        | Dexamethasone, Tocilizumab and their combination <sup>1,2,13-19</sup> ( <b>Major!</b> )<br>(Prolonged) mechanical ventilation <sup>20</sup><br>Environmental exposure/hospital air exposure/ventilation systems/building renovation work <sup>16,21</sup> <br>Chronic obstructive pulmonary disease <sup>2,12,13,16,17</sup><br>Greater extent of lung damage caused by COVID-19 <sup>12</sup> | Uncontrolled Diabetes Mellitus <sup>4,6,7,10,23-27</sup> <br>Newly diagnosed Diabetes Mellitus <sup>10</sup><br>Diabetic ketoacidosis <sup>27</sup><br>Hyperglycaemia <sup>27</sup><br>Systemic Corticosteroids <sup>4,6,7,10,23,25,27-31</sup> (  overuse)<br>COVID-19 related hypoxemia <sup>4,7</sup> | Indwelling devices (CVC, urinary catheter, prosthetic device)<br>Prolonged ICU stay <sup>20,35-37</sup>  11,38,39<br>CVCs <sup>36,40,41</sup>  11,38<br>More severe disease/higher organ failure assessment score <sup>20,42</sup><br>Corticosteroids and immunosuppressants <sup>20,35,40,41,43</sup> other |

|                    |                                                                                                                                                                                                                                                                                                                                                      |                                                                                                                                                                                                                                                                                                                                                                                                                                                                                                                                                                                                                                                                                                                                                                                                                                                                                                                                                                                                                               |                                                                                                                                                                                                                                                                                                                                                                                                                                                                                                                                                                                                                                   |
|--------------------|------------------------------------------------------------------------------------------------------------------------------------------------------------------------------------------------------------------------------------------------------------------------------------------------------------------------------------------------------|-------------------------------------------------------------------------------------------------------------------------------------------------------------------------------------------------------------------------------------------------------------------------------------------------------------------------------------------------------------------------------------------------------------------------------------------------------------------------------------------------------------------------------------------------------------------------------------------------------------------------------------------------------------------------------------------------------------------------------------------------------------------------------------------------------------------------------------------------------------------------------------------------------------------------------------------------------------------------------------------------------------------------------|-----------------------------------------------------------------------------------------------------------------------------------------------------------------------------------------------------------------------------------------------------------------------------------------------------------------------------------------------------------------------------------------------------------------------------------------------------------------------------------------------------------------------------------------------------------------------------------------------------------------------------------|
|                    | <p><b>Potential Minor Risk factors</b></p> <p>Negative air pressure in ICU rooms<sup>22</sup></p> <p>Azithromycin<sup>15</sup></p> <p>HIV/AIDS<sup>2</sup></p> <p>Solid cancer<sup>17,19</sup></p> <p>Pulmonary vascular disease<sup>19</sup></p> <p>Liver disease<sup>19</sup></p> <p>Multiple myeloma<sup>19</sup></p> <p>Diabetes<sup>9</sup></p> | <p>Iron overload<sup>10,32</sup></p> <p>Environmental exposure/hospital air exposure<sup>10,32</sup> </p> <p>Prolonged use of masks<sup>33</sup> </p> <p>Occupation farmer<sup>6</sup> </p> <p>ICU admission and mechanical ventilation<sup>27,30</sup></p> <p>Underlying malignancies or SOT<sup>27,30</sup></p> <p>Repeated nasopharyngeal swab testing<sup>33</sup> </p> <p>Exocrine damage</p> <p>Endothelial damage</p> <p>Overexpression of glucose regulated protein (GRP78)<sup>4</sup></p> <p><b>Potential Minor Risk factors</b></p> <p>Broad-spectrum antibiotics<sup>25,34</sup> </p> | <p>Tocilizumab<sup>20,37,44</sup></p> <p>Prior antifungal exposure<sup>39</sup>  including <i>C. auris</i></p> <p>Lack of hygiene plans/ABS program </p> <p>Broad spectrum antibiotics<sup>36,41,45</sup>  including <i>C. auris</i></p> <p>Malignancies<sup>20</sup></p> <p><b>Potential Minor Risk factors</b></p> <p>Mechanical ventilation<sup>38,40,41,46</sup></p> |
| Sites of infection | Lungs                                                                                                                                                                                                                                                                                                                                                | <p>ROM, ROCM<sup>4,47,48</sup> </p> <p>Pulmonary<sup>27,30,49</sup></p> <p>Gastrointestinal<sup>27</sup></p> <p>Disseminated</p>                                                                                                                                                                                                                                                                                                                                                                                                                                                                                                                                                                                                                                                                                                                                                                                                          | Bloodstream                                                                                                                                                                                                                                                                                                                                                                                                                                                                                                                                                                                                                       |
| Diagnostics        | <p>Imaging: halo sign, multiple pulmonary nodules or lung cavitation (alone not sufficient)<sup>50</sup></p> <p>Bronchoscopy, including tracheobronchial inspection and BAL sampling</p>                                                                                                                                                             | <p>RO(C)M: Nasal endoscopy<sup>29</sup></p> <p>Sinus debridement<sup>29</sup></p> <p>Cranial CT/MRI<sup>29</sup></p>                                                                                                                                                                                                                                                                                                                                                                                                                                                                                                                                                                                                                                                                                                                                                                                                                                                                                                          | <p>Blood cultures<sup>51</sup></p> <p>Imaging (abdomen)<sup>52</sup></p>                                                                                                                                                                                                                                                                                                                                                                                                                                                                                                                                                          |

|                     |                                                                                                                                                                                          |                                                                                                                                                                                                                                                                                                                                                                 |                                                                                                                               |
|---------------------|------------------------------------------------------------------------------------------------------------------------------------------------------------------------------------------|-----------------------------------------------------------------------------------------------------------------------------------------------------------------------------------------------------------------------------------------------------------------------------------------------------------------------------------------------------------------|-------------------------------------------------------------------------------------------------------------------------------|
|                     | <p>Culture, microscopy and PCR from BAL and lung biopsy samples<sup>50</sup></p> <p>Galactomannan from BAL<sup>50</sup></p> <p>Biopsy</p>                                                | <p>Pulmonary:</p> <p>Imaging: Halo sign or reversed halo sign, vascular occlusion sign<sup>29</sup></p> <p>Culture</p> <p>Direct microscopy using fluorescent brightener<sup>29</sup></p> <p>Histopathology</p>                                                                                                                                                 |                                                                                                                               |
| Therapy             | <p>Voriconazole or isavuconazole as first line for possible, probable, and proven CAPA<sup>50</sup></p> <p>Amphotericin B, posaconazole or echinocandins as second line<sup>50</sup></p> | <p>Surgical debridement<sup>29</sup></p> <p>Liposomal amphotericin B<sup>29</sup></p> <p>If renal compromise isavuconazole iv or posaconazole iv<sup>53</sup></p>                                                                                                                                                                                               | <p>Caspofungin or micafungin as first line<sup>51,54,55</sup></p> <p>Liposomal amphotericin B as second line<sup>55</sup></p> |
| Follow up           | <p>Repeated susceptibility testing for resistance<sup>50</sup></p>                                                                                                                       |                                                                                                                                                                                                                                                                                                                                                                 | <p>Repeated blood cultures until clearance<sup>51</sup></p>                                                                   |
| Clinical outcome    | <p>About 50% mortality rate at 12 weeks, 17.2% attributed<sup>2,9,13,56</sup></p>                                                                                                        | <p>Case-fatality rate at 12 weeks 45.7%<sup>4</sup></p> <p>Age, rhino-orbital-cerebral involvement, and intensive care unit admission were associated with increased mortality rates<sup>4</sup></p> <p>Mortality lower for RO(C)M 37.3% (22/59) versus 81% (17/21) for pulmonary, gastrointestinal and disseminated mucormycosis (P&lt;0.001)<sup>27</sup></p> |                                                                                                                               |
| Challenges in LMICs | <p>Countries with lower socioeconomic status are likely to have inadequate resources available to diagnose and treat patients with CAPA</p>                                              | <p>Disfiguring surgeries may be the first option for RO(C)M before considering expensive antifungals</p>                                                                                                                                                                                                                                                        | <p>Resource-limitation to run and repeat susceptibility tests</p>                                                             |

## 6 References

- 7 1. Prattes J, Wauters J, Giacobbe DR, et al. Risk factors and outcome of pulmonary aspergillosis in critically ill coronavirus disease 2019 patients-a  
8 multinational observational study by the European Confederation of Medical Mycology. *Clin Microbiol Infect* 2021.
- 9 2. Janssen NAF, Nyga R, Vanderbeke L, et al. Multinational Observational Cohort Study of COVID-19-Associated Pulmonary Aspergillosis(1). *Emerg Infect*  
10 *Dis* 2021; **27**(11): 2892-8.
- 11 3. Fekkar A, Neofytos D, Nguyen MH, Clancy CJ, Kontoyiannis DP, Lamoth F. COVID-19-associated pulmonary aspergillosis (CAPA): how big a problem is it?  
12 *Clin Microbiol Infect* 2021; **27**(9): 1376-8.
- 13 4. Patel A, Agarwal R, Rudramurthy SM, et al. Multicenter Epidemiologic Study of Coronavirus Disease-Associated Mucormycosis, India. *Emerg Infect Dis*  
14 2021; **27**(9): 2349-59.
- 15 5. Narayanan S, Chua JV, Baddley JW. COVID-19 associated Mucormycosis (CAM): risk factors and mechanisms of disease. *Clin Infect Dis* 2021.
- 16 6. Gupta S, Ahuja P. Risk Factors for Procurement of Mucormycosis and its Manifestations Post Covid-19: a Single Arm Retrospective Unicentric Clinical  
17 Study. *Indian J Otolaryngol Head Neck Surg* 2021: 1-8.
- 18 7. Sen M, Honavar SG, Bansal R, et al. Epidemiology, clinical profile, management, and outcome of COVID-19-associated rhino-orbital-cerebral  
19 mucormycosis in 2826 patients in India - Collaborative OPAI-IJO Study on Mucormycosis in COVID-19 (COSMIC), Report 1. *Indian J Ophthalmol* 2021; **69**(7):  
20 1670-92.
- 21 8. Muthu V, Kumar M, Paul RA, et al. Is there an association between zinc and COVID-19-associated mucormycosis? Results of an experimental and clinical  
22 study. *Mycoses* 2021; **64**(10): 1291-7.
- 23 9. Salmanton-García J, Sprute R, Stemler J, et al. COVID-19-Associated Pulmonary Aspergillosis, March-August 2020. *Emerg Infect Dis* 2021; **27**(4): 1077-86.
- 24 10. Bhanuprasad K, Manesh A, Devasagayam E, et al. Risk factors associated with the mucormycosis epidemic during the COVID-19 pandemic. *Int J Infect*  
25 *Dis* 2021; **111**: 267-70.
- 26 11. Chowdhary A, Tarai B, Singh A, Sharma A. Multidrug-Resistant *Candida auris* Infections in Critically Ill Coronavirus Disease Patients, India, April-July  
27 2020. *Emerg Infect Dis* 2020; **26**(11): 2694-6.
- 28 12. Arastehfar A, Carvalho A, van de Veerdonk FL, et al. COVID-19 Associated Pulmonary Aspergillosis (CAPA)-From Immunology to Treatment. *J Fungi*  
29 *(Basel)* 2020; **6**(2).
- 30 13. Chong WH, Saha BK, Neu KP. Comparing the clinical characteristics and outcomes of COVID-19-associated pulmonary aspergillosis (CAPA): a systematic  
31 review and meta-analysis. *Infection* 2021: 1-14.
- 32 14. Gangneux JD, E; Fekkar, A; Luyt, CE; Botterel, FDe Prost, N. Fungal infections in mechanically ventilated COVID-19 patients in the ICU during the 1 first  
33 wave: The French multicenter MYCOVID study. *Lancet Resp Med* 2021.
- 34 15. Dellièrè S, Dudoignon E, Fodil S, et al. Risk factors associated with COVID-19-associated pulmonary aspergillosis in ICU patients: a French multicentric  
35 retrospective cohort. *Clin Microbiol Infect* 2020; **27**(5): 790.e1-5.
- 36 16. Montrucchio G, Lupia T, Lombardo D, et al. Risk factors for invasive aspergillosis in ICU patients with COVID-19: current insights and new key elements.  
37 *Ann Intensive Care* 2021; **11**(1): 136.

- 38 17. White PL, Dhillon R, Cordey A, et al. A National Strategy to Diagnose Coronavirus Disease 2019-Associated Invasive Fungal Disease in the Intensive Care  
39 Unit. *Clin Infect Dis* 2021; **73**(7): e1634-e44.
- 40 18. Meijer EFJ, Dofferhoff ASM, Hoiting O, Meis JF. COVID-19-associated pulmonary aspergillosis: a prospective single-center dual case series. *Mycoses*  
41 2021; **64**(4): 457-64.
- 42 19. Permpalung N, Chiang TP, Massie AB, et al. COVID-19 Associated Pulmonary Aspergillosis in Mechanically Ventilated Patients. *Clin Infect Dis* 2021.
- 43 20. Segrelles-Calvo G, de SAGR, Llopis-Pastor E, et al. Candida spp. co-infection in COVID-19 patients with severe pneumonia: Prevalence study and  
44 associated risk factors. *Respir Med* 2021; **188**: 106619.
- 45 21. Soriano MC, Narváez-Chávez G, López-Olivencia M, Fortún J, de Pablo R. Inhaled amphotericin B lipid complex for prophylaxis against COVID-19-  
46 associated invasive pulmonary aspergillosis. *Intensive Care Medicine* 2022; **48**(3): 360-1.
- 47 22. Ichai P, Saliba F, Baune P, Daoud A, Coilly A, Samuel D. Impact of negative air pressure in ICU rooms on the risk of pulmonary aspergillosis in COVID-19  
48 patients. *Crit Care* 2020; **24**(1): 538.
- 49 23. Pradhan P, Shaikh Z, Mishra A, et al. Predisposing factors of rhino-orbital-cerebral mucormycosis in patients with COVID 19 infection. *Indian J*  
50 *Otolaryngol Head Neck Surg* 2021: 1-7.
- 51 24. Pakdel F, Ahmadikia K, Salehi M, et al. Mucormycosis in patients with COVID-19: A cross-sectional descriptive multicentre study from Iran. *Mycoses*  
52 2021; **64**(10): 1238-52.
- 53 25. Selarka L, Sharma S, Saini D, et al. Mucormycosis and COVID-19: An epidemic within a pandemic in India. *Mycoses* 2021; **64**(10): 1253-60.
- 54 26. Avatef Fazeli M, Rezaei L, Javadirad E, et al. Increased incidence of rhino-orbital mucormycosis in an educational therapeutic hospital during the COVID-  
55 19 pandemic in western Iran: An observational study. *Mycoses* 2021; **64**(11): 1366-77.
- 56 27. Hoenigl MS, D; Carvalho, Ag; Rudramurthy, SM; Arastehfar, A; Gangneux, JP; Nasir, N; Bonifaz, A; Araiza, J; Klimko, N; Serris, A; Lagrou, K; Meis, JF;  
57 Cornely, OA; Perfect, JR; White, PL; Chakrabarti, A; and Group, ECMM and ISHAM Collaborators. The Emergence of COVID-19 Associated Mucormycosis:  
58 Analysis of Cases From 18 Countries. Available at SSRN: <https://ssrncom/abstract=3844587> or <http://dxdoiorg/102139/ssrn3844587> 2021.
- 59 28. Garg D, Muthu V, Sehgal IS, et al. Coronavirus Disease (Covid-19) Associated Mucormycosis (CAM): Case Report and Systematic Review of Literature.  
60 *Mycopathologia* 2021: 1-10.
- 61 29. Rudramurthy SM, Hoenigl M, Meis JF, et al. ECMM/ISHAM recommendations for clinical management of COVID -19 associated mucormycosis in low-  
62 and middle-income countries. *Mycoses* 2021.
- 63 30. Seidel D, Simon M, Sprute R, et al. Results from a national survey on COVID-19 associated mucormycosis in Germany: 13 patients from six tertiary  
64 hospitals. *Mycoses* 2021.
- 65 31. Ramaswami A, Sahu AK, Kumar A, et al. COVID-19-associated mucormycosis presenting to the Emergency Department-an observational study of 70  
66 patients. *Qjm* 2021; **114**(7): 464-70.
- 67 32. Chen N, Zhou M, Dong X, et al. Epidemiological and clinical characteristics of 99 cases of 2019 novel coronavirus pneumonia in Wuhan, China: a  
68 descriptive study. *Lancet* 2020; **395**(10223): 507-13.
- 69 33. Arora U, Priyadarshi M, Katiyar V, et al. Risk factors for Coronavirus disease-associated mucormycosis. *J Infect* 2022; **84**(3): 383-90.
- 70 34. Arora S, Hemmige VS, Mandke C, et al. Online Registry of COVID-19-Associated Mucormycosis Cases, India, 2021. *Emerg Infect Dis* 2021; **27**(11): 2963-5.

- 71 35. Mastrangelo A, Germinario BN, Ferrante M, et al. Candidemia in Coronavirus Disease 2019 (COVID-19) Patients: Incidence and Characteristics in a  
72 Prospective Cohort Compared With Historical Non-COVID-19 Controls. *Clin Infect Dis* 2021; **73**(9): e2838-e9.
- 73 36. Al-Hatmi AMS, Mohsin J, Al-Huraizi A, Khamis F. COVID-19 associated invasive candidiasis. *J Infect* 2021; **82**(2): e45-e6.
- 74 37. Ezeokoli OT, Gcilitshana O, Pohl CH. Risk Factors for Fungal Co-Infections in Critically Ill COVID-19 Patients, with a Focus on Immunosuppressants. *J*  
75 *Fungi (Basel)* 2021; **7**(7).
- 76 38. Villanueva-Lozano H, Treviño-Rangel RJ, González GM, et al. Outbreak of Candida auris infection in a COVID-19 hospital in Mexico. *Clin Microbiol Infect*  
77 2021; **27**(5): 813-6.
- 78 39. Moin S, Farooqi J, Rattani S, Nasir N, Zaka S, Jabeen K. C. auris and non-C. auris candidemia in hospitalized adult and pediatric COVID-19 patients; single  
79 center data from Pakistan. *Med Mycol* 2021.
- 80 40. Seagle EE, Jackson BR, Lockhart SR, et al. The landscape of candidemia during the COVID-19 pandemic. *Clin Infect Dis* 2021.
- 81 41. Arastehfar A, Carvalho A, Nguyen MH, et al. COVID-19-Associated Candidiasis (CAC): An Underestimated Complication in the Absence of Immunological  
82 Predispositions? *J Fungi (Basel)* 2020; **6**(4).
- 83 42. Omrani AS, Koleri J, Abid FB, et al. Clinical Characteristics and Risk Factors for COVID-19-associated Candidemia. *Med Mycol* 2021.
- 84 43. Kayaaslan B, Eser F, Kaya Kalem A, et al. Characteristics of candidemia in COVID-19 patients; increased incidence, earlier occurrence and higher  
85 mortality rates compared to non-COVID-19 patients. *Mycoses* 2021; **64**(9): 1083-91.
- 86 44. Antinori S, Bonazzetti C, Gubertini G, et al. Tocilizumab for cytokine storm syndrome in COVID-19 pneumonia: an increased risk for candidemia?  
87 *Autoimmun Rev* 2020; **19**(7): 102564.
- 88 45. Allaw F, Kara Zahreddine N, Ibrahim A, et al. First Candida auris Outbreak during a COVID-19 Pandemic in a Tertiary-Care Center in Lebanon. *Pathogens*  
89 2021; **10**(2).
- 90 46. Nucci M, Barreiros G, Guimarães LF, Deriquehem VAS, Castiñeiras AC, Nouér SA. Increased incidence of candidemia in a tertiary care hospital with the  
91 COVID-19 pandemic. *Mycoses* 2021; **64**(2): 152-6.
- 92 47. Singh Y, Ganesh V, Kumar S, et al. Coronavirus Disease-Associated Mucormycosis from a Tertiary Care Hospital in India: A Case Series. *Cureus* 2021;  
93 **13**(7): e16152.
- 94 48. Alfishawy M, Elbendary A, Younes A, et al. Diabetes mellitus and Coronavirus Disease (Covid-19) Associated Mucormycosis (CAM): A wake-up call from  
95 Egypt. *Diabetes Metab Syndr* 2021; **15**(5): 102195.
- 96 49. Fekkar A, Lampros A, Mayaux J, et al. Occurrence of Invasive Pulmonary Fungal Infections in Patients with Severe COVID-19 Admitted to the ICU. *Am J*  
97 *Respir Crit Care Med* 2021; **203**(3): 307-17.
- 98 50. Koehler P, Bassetti M, Chakrabarti A, et al. Defining and managing COVID-19-associated pulmonary aspergillosis: the 2020 ECMM/ISHAM consensus  
99 criteria for research and clinical guidance. *The Lancet Infectious Diseases* 2020.
- 100 51. Mellinghoff SC, Hoenigl M, Koehler P, et al. EQUAL Candida Score: An ECMM score derived from current guidelines to measure QUALity of Clinical  
101 Candidaemia Management. *Mycoses* 2018; **61**(5): 326-30.
- 102 52. Bassetti M, Peghin M, Canelutti A, et al. Clinical characteristics and predictors of mortality in cirrhotic patients with candidemia and intra-abdominal  
103 candidiasis: a multicenter study. *Intensive care medicine* 2017; **43**(4): 509-18.

- 104 53. Cornely OA, Alastruey-Izquierdo A, Arenz D, et al. Global guideline for the diagnosis and management of mucormycosis: an initiative of the European  
105 Confederation of Medical Mycology in cooperation with the Mycoses Study Group Education and Research Consortium. *Lancet Infect Dis* 2019.
- 106 54. Seagle EE, Jackson BR, Lockhart SR, et al. The Landscape of Candidemia During the Coronavirus Disease 2019 (COVID-19) Pandemic. *Clinical Infectious  
107 Diseases* 2022; **74**(5): 802-11.
- 108 55. Cornely OA, Bassetti M, Calandra T, et al. ESCMID\* guideline for the diagnosis and management of Candida diseases 2012: non-neutropenic adult  
109 patients. *Clin Microbiol Infect* 2012; **18 Suppl 7**: 19-37.
- 110 56. Prattes J, Wauters J, Giacobbe DR, et al. Risk factors and outcome of pulmonary aspergillosis in critically ill coronavirus disease 2019 patients- a  
111 multinational observational study by the European Confederation of Medical Mycology. *Clin Microbiol Infect* 2021.

112
